# Supplementary material for: Biochemical characterization of the selenoproteome in Gallus gallus via bioinformatics analysis: structure–function relationships and interactions of binding molecules
Source: Royal Society of Chemistry journal article supplement (doi:10.1039/c6mt00254d), 2017-01-01
Supplement: c6mt00254d1.pdf [file c6mt00254d1.pdf]

# **A biochemical characterization of the selenoproteome in *Gallus gallus* via bioinformatics analysis: structure-function relationships and interactions of binding molecules**

Shi-Yong Zhu<sup>a\*</sup>, Xue-Nan Li<sup>a\*</sup>, Xiao-Chen Sun<sup>a\*</sup>, Jia Lin<sup>a</sup>, Wei Li<sup>a</sup>, Cong Zhang<sup>a</sup>,  
Jin-Long Li<sup>a\*\*</sup>

<sup>a</sup>:College of Veterinary Medicine, Northeast Agricultural University, Harbin, 150030, People's  
Republic of China. E-mail: Jinlongli@neau.edu.cn Tel: +86 451 55190407.

## **Contents**

|                                        |       |
|----------------------------------------|-------|
| Analytical data in chicken GPx1 .....  | 1 - 3 |
| Analytical data in chicken GPx2 .....  | 4 - 6 |
| Analytical data in chicken GPx3 .....  | 7 - 9 |
| Analytical data in chicken GPx4 .....  | 10-12 |
| Analytical data in chicken DIO1 .....  | 13-16 |
| Analytical data in chicken DIO2 .....  | 17-19 |
| Analytical data in chicken DIO3 .....  | 20-23 |
| Analytical data in chicken TrxR1 ..... | 24-26 |
| Analytical data in chicken TrxR2 ..... | 27-29 |
| Analytical data in chicken TrxR3 ..... | 30-32 |
| Analytical data in chicken Sell .....  | 33-36 |
| Analytical data in chicken SelS .....  | 37-40 |
| Analytical data in chicken SelK .....  | 41-44 |
| Analytical data in chicken SelT .....  | 45-48 |
| Analytical data in chicken SelN .....  | 49-51 |
| Analytical data in chicken SelH .....  | 52-54 |
| Analytical data in chicken SelW .....  | 55-57 |
| Analytical data in chicken Sep15 ..... | 58-60 |
| Analytical data in chicken SelM .....  | 61-63 |
| Analytical data in chicken SepP1 ..... | 64-66 |
| Analytical data in chicken SepP2 ..... | 67-69 |
| Analytical data in chicken SelO .....  | 70-72 |
| Analytical data in chicken SelU .....  | 73-75 |
| Analytical data in chicken MsrB1 ..... | 76-78 |

## The accession number and amino acid sequences of chicken

### GPx1

# GPx1 [Gallus gallus]

LOCUS NP\_001264782 195 aa linear  
VRT 31-JUL-2016

DEFINITION glutathione peroxidase 1 [Gallus gallus].

ACCESSION NP\_001264782 XP\_003642043

VERSION NP\_001264782.2

DBSOURCE REFSEQ: accession NM\_001277853.2

KEYWORDS RefSeq.

SOURCE Gallus gallus (chicken)

ORGANISM Gallus gallus

Eukaryota; Metazoa; Chordata;  
Craniata; Vertebrata; Euteleostomi;  
Archelosauria; Archosauria; Dinosauria;  
Saurischia; Theropoda; Coelurosauria;  
Aves; Neognathae; Galloanserae;  
Galliformes; Phasianidae; Phasianinae;  
Gallus.

>NP\_001264782.2 glutathione peroxidase 1 [Gallus gallus]  
MAATGLAGILARPLGAAEPLALSSLRGKVLLVVNVASLU  
GTTTRDFLQLNELQQRYGPRGLRVLGFPNCNQFGHQEN  
ATNEEILRSLEYVRPGNGFKPNFTMFEKCEVNGKGAHP  
LFAFLREALPFPHDDPSALMTNPQYIIWSPVCRNDVSW  
NFEKFLVGPDGVPFRRYSRHFETIKLQDDIELLLQKVPKE  
ALQ

# Analysis of the GPx1

## The structural modeling of chicken GPx1

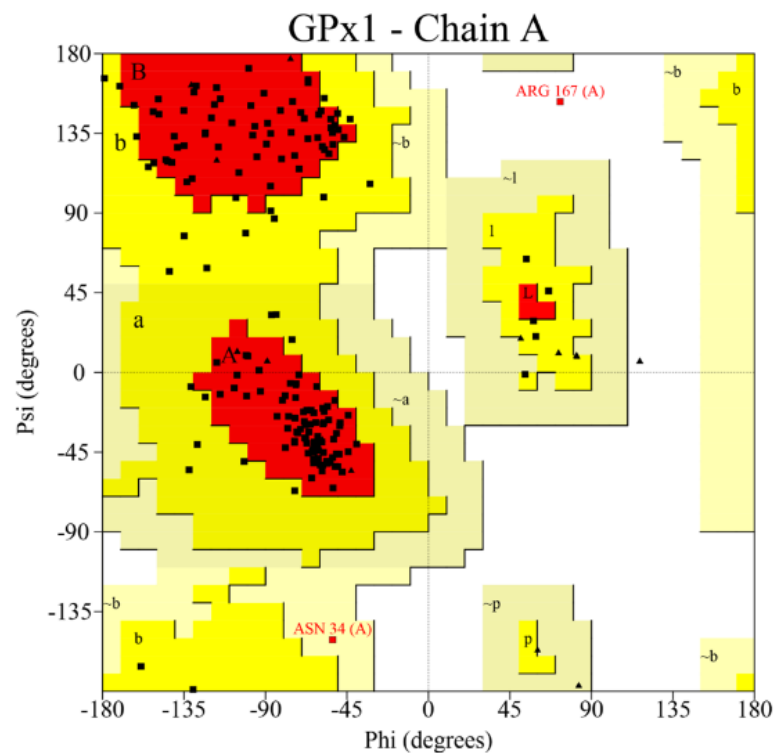

## Verify 3D

90.77% of the residues had an averaged 3D-1D score  $\geq 0.2$

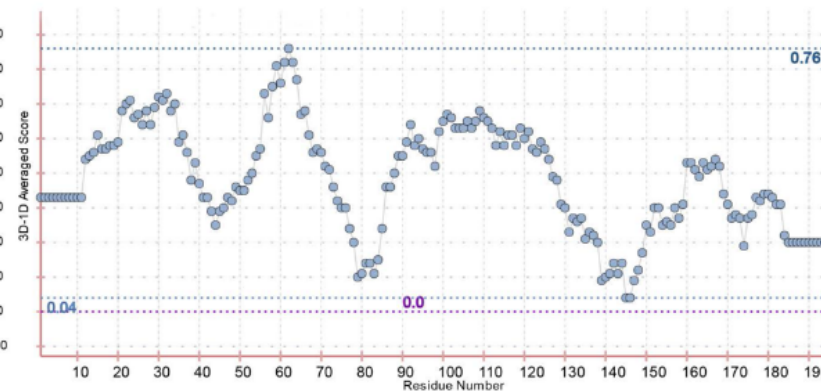

## ERRAT2

Overall quality factor\*\*: 92.973

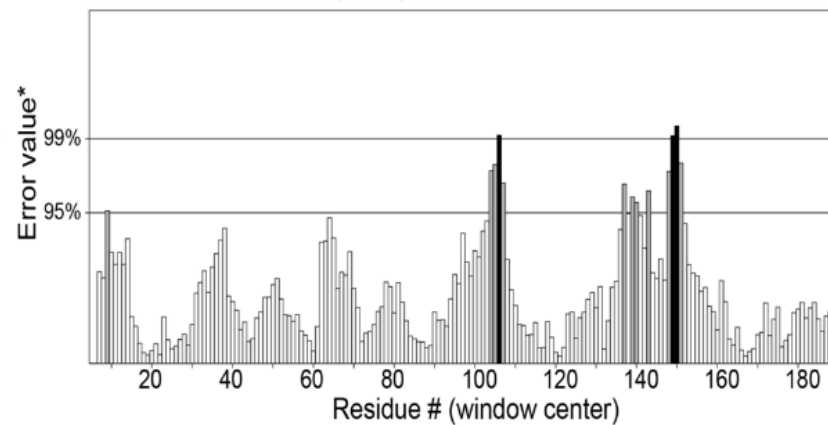

### The predictions of ligand binding sites in chicken GPx1

| Protein | Lig Name | C-score <sup>EC</sup> | Ligand Binding Site Residues      |
|---------|----------|-----------------------|-----------------------------------|
| GPx1    | POP      | 0.12                  | 150, 151, 155, 168, 169, 170, 171 |
|         | PER      | 0.08                  | 39, 40, 41, 42, 155               |
|         | CA       | 0.05                  | 69, 70, 106                       |
|         | 3GKNB00  | 0.04                  | 62, 99, 100                       |
|         | AMP      | 0.03                  | 34, 35, 36, 66, 67, 68, 150, 171  |

1. C-score is the confidence score of the prediction. C-score ranges (0-1), where a higher score indicates a more reliable prediction
2. Lig Name is name of possible binding ligand. The information of binding ligands is shown in PDB



## The accession number and amino acid sequences of chicken

### GPx2

# GPx2 [Gallus gallus]

LOCUS NP\_001264783 191 aa linear  
VRT 26-JUL-2016

DEFINITION glutathione peroxidase 2 [Gallus gallus].

ACCESSION NP\_001264783 XP\_003641324

VERSION NP\_001264783.1

DBSOURCE REFSEQ: accession NM\_001277854.1

KEYWORDS RefSeq.

SOURCE Gallus gallus (chicken)

ORGANISM Gallus gallus

Eukaryota; Metazoa; Chordata;  
Craniata; Vertebrata; Euteleostomi;  
Archelosauria; Archosauria; Dinosauria;  
Saurischia; Theropoda; Coelurosauria;  
Aves; Neognathae; Galloanserae;  
Galliformes; Phasianidae; Phasianinae;  
Gallus.

>NP\_001264783.1 glutathione peroxidase 2 [Gallus gallus]  
MSVPIAKSFYDLSATSLQGEKVDFNVFRGRVVLIENTVAS  
LUGTTVRDYTQLNQLQARYPRRLVVLGFPCNQFGYQEN  
GTNEEILNCLKHVRPGGGFEPNFTLFQKCQVNGKDTHP  
VFAYLKAHLPAVPDEADHLMAEPRFLVWSPVRRSDISW  
NFEKFLVGPEGEPPRRYSPRLPTTQIEPDIQRLLKLAK

# Analysis of the GPx2

## The structural modeling of chicken GPx2

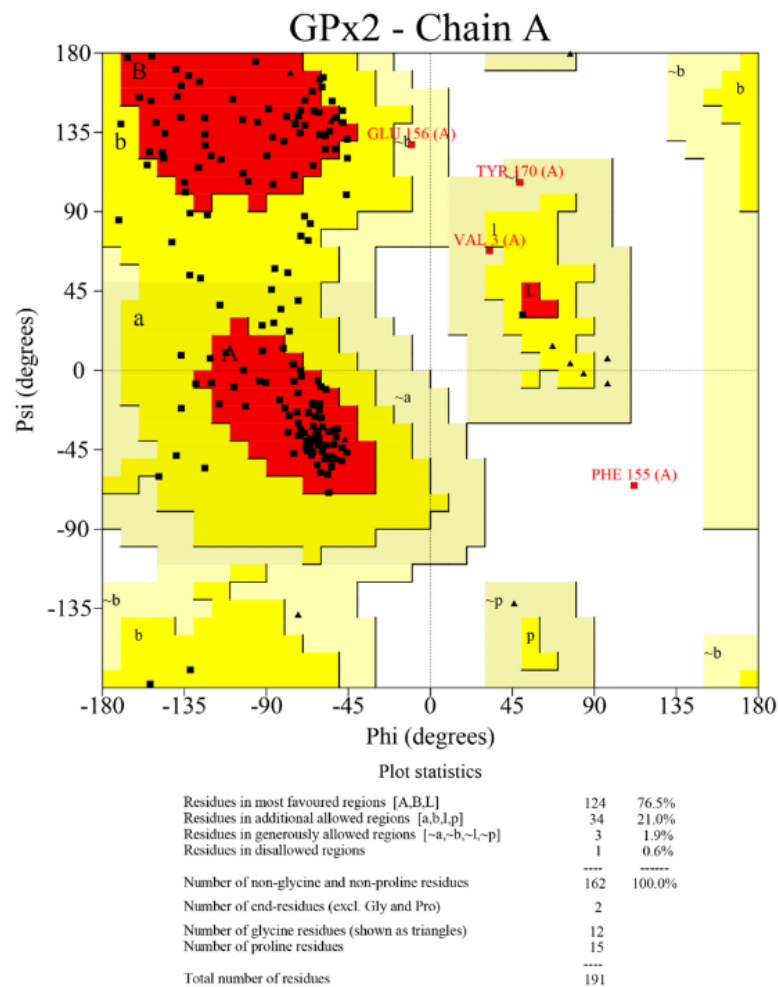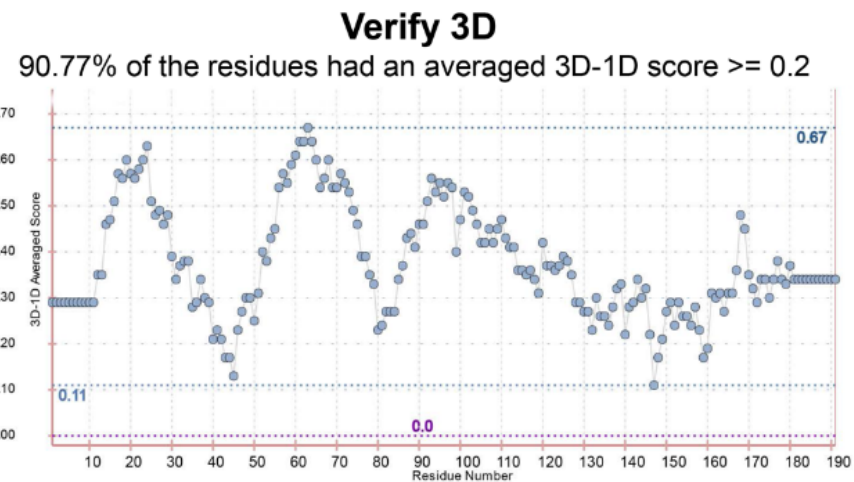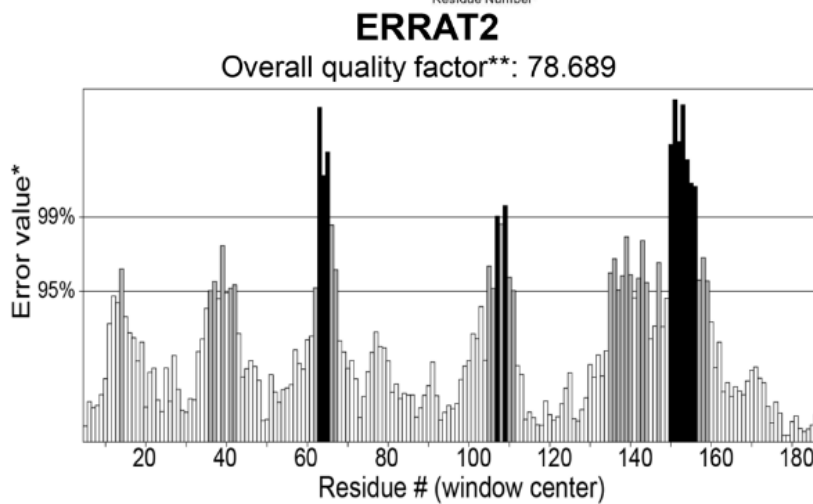

### The predictions of ligand binding sites in chicken GPx2

| Protein | Lig Name | C-score <sup>EC</sup> | Ligand Binding Site Residues          |
|---------|----------|-----------------------|---------------------------------------|
| GPx2    | POP      | 0.15                  | 126, 151, 152, 156, 169, 170, 171,172 |
|         | C6W      | 0.04                  | 40, 69, 109                           |
|         | BIH      | 0.04                  | 17, 18, 63, 99, 100, 101              |
|         | BEZ      | 0.04                  | 36, 41                                |
|         | CA       | 0.03                  | 10, 11, 23, 25                        |

1. C-score is the confidence score of the prediction. C-score ranges (0-1), where a higher score indicates a more reliable prediction
2. Lig Name is name of possible binding ligand. The information of binding ligands is shown in PDB

## The accession number and amino acid sequences of chicken

### GPx3

# GPx3 [Gallus gallus]

LOCUS NP\_001156704 219 aa linear  
VRT 03-AUG-2016

DEFINITION glutathione peroxidase 3 precursor  
[Gallus gallus].

ACCESSION NP\_001156704

VERSION NP\_001156704.1

DBSOURCE REFSEQ: accession NM\_001163232.2

KEYWORDS RefSeq.

SOURCE Gallus gallus (chicken)

ORGANISM Gallus gallus

Eukaryota; Metazoa; Chordata;  
Craniata; Vertebrata; Euteleostomi;  
Archelosauria; Archosauria; Dinosauria;  
Saurischia; Theropoda; Coelurosauria;  
Aves; Neognathae; Galloanserae;  
Galliformes; Phasianidae; Phasianinae;  
Gallus.

>NP\_001156704.1 glutathione peroxidase 3 precursor  
[Gallus gallus]

MGCRAACVLAVLLAGLVPLGQGQEREKVKCYDSVRGTI  
YDYGALTIDGDEYIPFRKYAGKMVLFVNVATYUGLTLQYL  
ELNALQNELGPYGLVVLGFPSNQFGKQEPGQNSEILPAL  
KYVRPGGGFVVPNFQLFQKGDVNGAKEQKVYSFLKNSC  
PPVAEEFGNPKNLFWEPLRNHDIKWNFEKFLVGTGVP  
VMRWYHRANIATVKNDIIAYMRQQRGQ

# Analysis of the GPx3

## The structural modeling of chicken GPx3

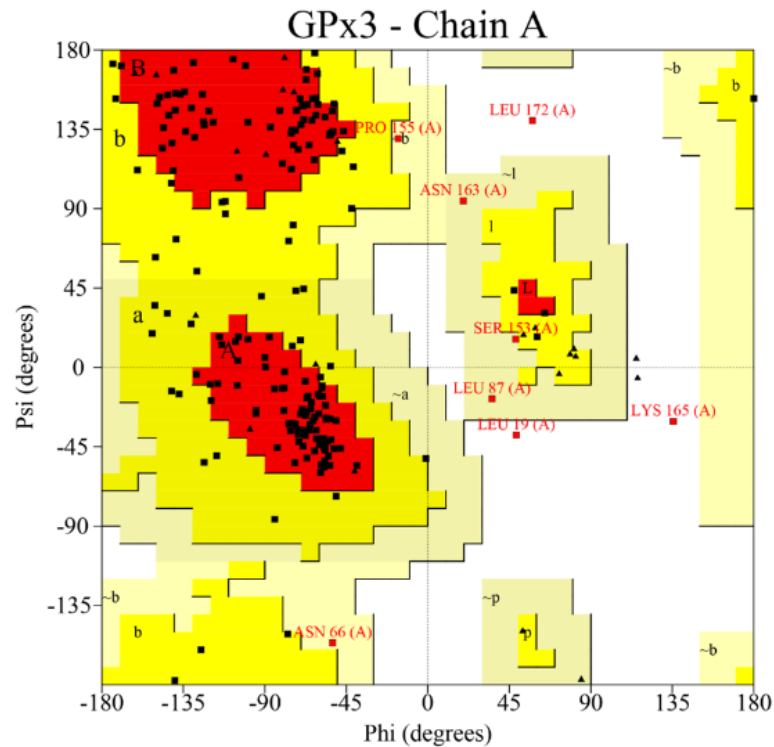

## Verify 3D

87.21% of the residues had an averaged 3D-1D score  $\geq 0.2$

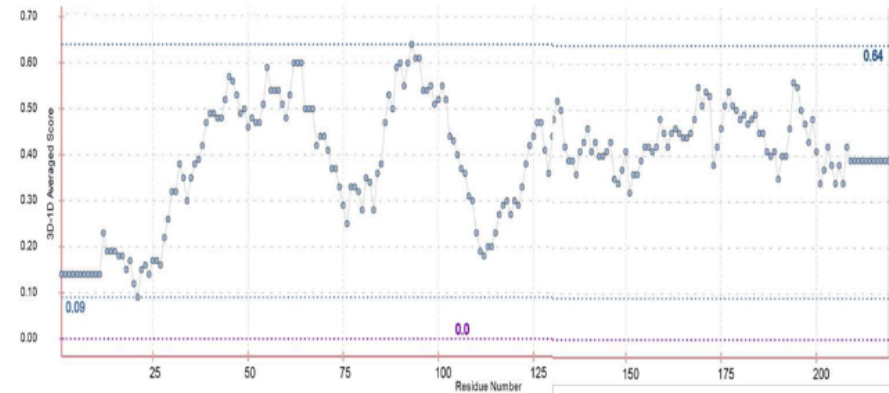

## ERRAT2

Overall quality factor\*\*: 76.777

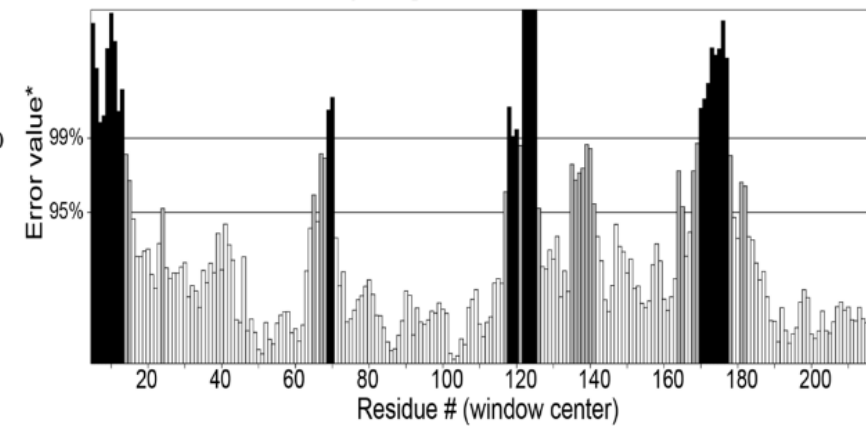

### The predictions of ligand binding sites in chicken GPx3

| Protein | Lig Name | C-score <sup>EC</sup> | Ligand Binding Site Residues                |
|---------|----------|-----------------------|---------------------------------------------|
| GPx3    | POP      | 0.11                  | 156, 157, 177, 178, 182, 195, 196, 197, 198 |
|         | GSH      | 0.05                  | 68, 71, 73, 178, 179, 180, 181, 198, 199    |
|         | CU       | 0.05                  | 68, 71, 74, 179                             |
|         | CA       | 0.04                  | 45, 46, 52, 131, 132                        |
|         | CA       | 0.02                  | 100, 101, 137                               |

1. C-score is the confidence score of the prediction. C-score ranges (0-1), where a higher score indicates a more reliable prediction
2. Lig Name is name of possible binding ligand. The information of binding ligands is shown in PDB

## The accession number and amino acid sequences of chicken

### GPx4

# GPx4 [Gallus gallus]

LOCUS AF498316\_1 170 aa linear  
VRT 27-APR-2004  
DEFINITION phospholipid hydroperoxide glutathione  
peroxidase [Gallus gallus].  
ACCESSION AAM18080  
VERSION AAM18080.2  
DBSOURCE accession AF498316.2  
KEYWORDS .  
SOURCE Gallus gallus (chicken)  
ORGANISM Gallus gallus  
Eukaryota; Metazoa; Chordata;  
Craniata; Vertebrata; Euteleostomi;  
Archelosauria; Archosauria; Dinosauria;  
Saurischia; Theropoda; Coelurosauria;  
Aves; Neognathae; Galloanserae;  
Galliformes; Phasianidae; Phasianinae;  
Gallus.

>AAM18080.2 phospholipid hydroperoxide glutathione  
peroxidase [Gallus gallus]  
MCAQADEWRSATSIYDFHARDIDGRDVSLEQYRGFVCII  
TNVASKUGKTAVNYTQLVDLHARYAEKGLRILAFPCNQF  
GKQEPGDDAQIKAFAEGYGVKFD MF SKIEVNGDGAHPL  
WKWLKEQPKGRGTLGNAIKWNFTKFLINREGQVVKRYS  
PMEDPYVIEKDLPAYL

# Analysis of the GPx4

## The structural modeling in chicken GPx4

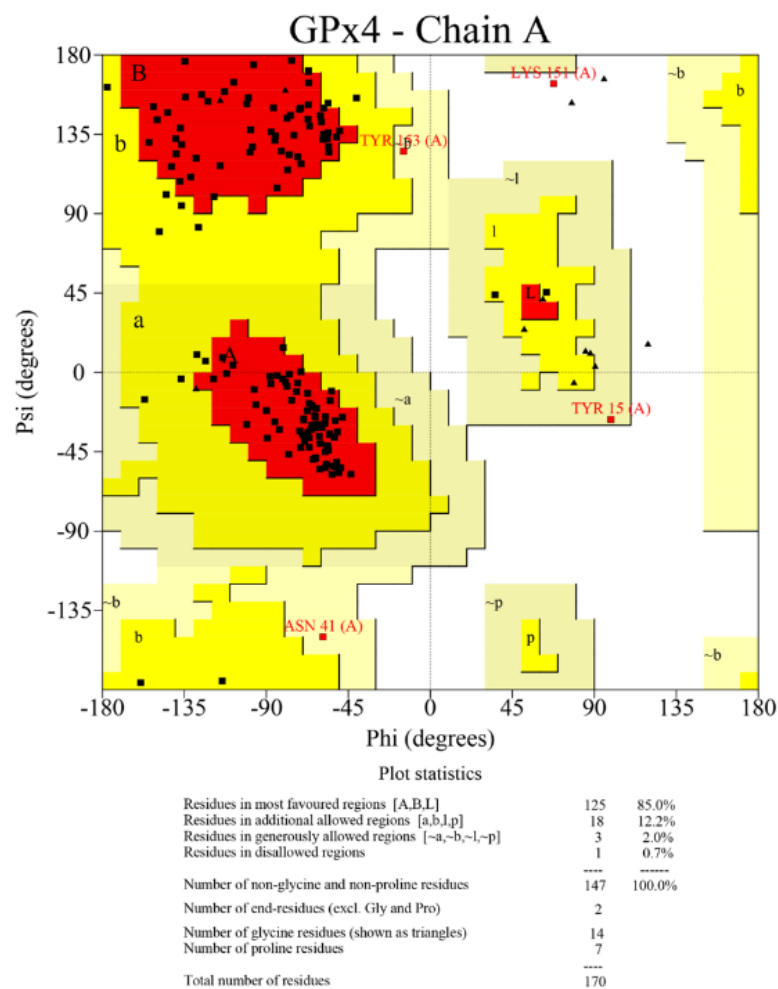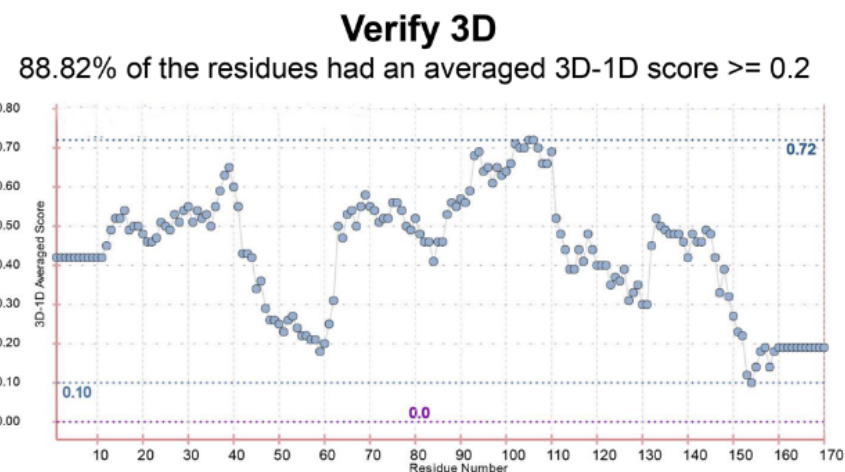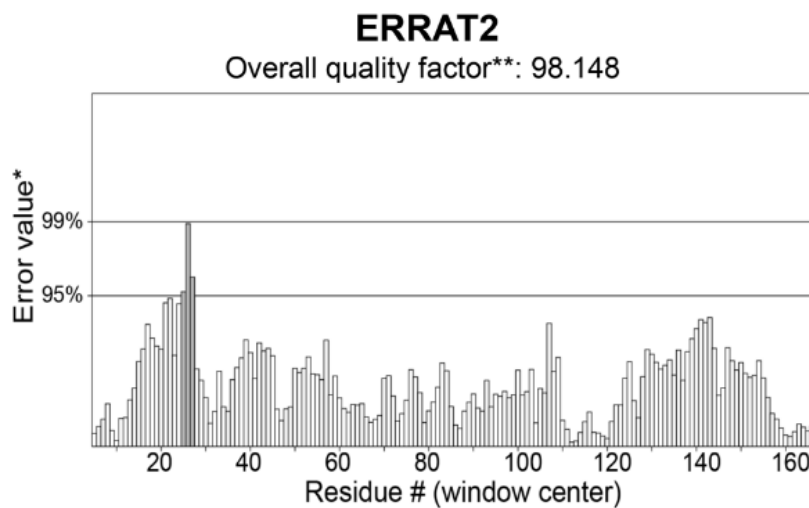



### The predictions of ligand binding sites in chicken GPx4

| Protein | Lig Name | C-score <sup>EC</sup> | Ligand Binding Site Residues                |
|---------|----------|-----------------------|---------------------------------------------|
| GPx4    | POP      | 0.29                  | 128, 129, 134, 135, 139, 152, 153, 154, 155 |
|         | PER      | 0.11                  | 49, 50, 51, 52, 140                         |
|         | BIH      | 0.07                  | 21, 22, 69, 99, 100, 101                    |
|         | SO4      | 0.06                  | 105, 107, 109, 136                          |
|         | CA       | 0.06                  | 16, 17, 29, 30                              |

1. C-score is the confidence score of the prediction. C-score ranges (0-1), where a higher score indicates a more reliable prediction
2. Lig Name is name of possible binding ligand. The information of binding ligands is shown in PDB

## The accession number and amino acid sequences of chicken

### DIO1

# DIO1 [Gallus gallus]

LOCUS NP\_001091083 246 aa linear  
VRT 29-APR-2016  
DEFINITION type I iodothyronine deiodinase [Gallus gallus].  
ACCESSION NP\_001091083 XP\_422487  
VERSION NP\_001091083.1  
DBSOURCE REFSEQ: accession NM\_001097614.1  
KEYWORDS RefSeq.  
SOURCE Gallus gallus (chicken)  
ORGANISM Gallus gallus  
Eukaryota; Metazoa; Chordata;  
Craniata; Vertebrata; Euteleostomi;  
Archelosauria; Archosauria; Dinosauria;  
Saurischia; Theropoda; Coelurosauria;  
Aves; Neognathae; Galloanserae;  
Galliformes; Phasianidae; Phasianinae;  
Gallus.

>NP\_001091083.1 type I iodothyronine deiodinase [Gallus gallus]

MLSIRVLLHKLLILLQVTL SVVVGKTMMILFPD TTKRYILKL  
GEKSRMNQNP KFSYENWGPTFFSFQYLLFVLKVKWRR  
LEDEAHEGRPAPNTPVVALNGEMQHLSFMRDNRPLIL  
NFGSCTUPSFMLKFDEFNKLVKDFSSIADFLIIYIEEAHAV  
DGWAFRNNVVIKNHRSLED RKTA AQFLQQKNPLCPVVL  
DTMENLSSSKYAALPERLYILQAGNVIYKGGVGPWNYH  
PQEIRAVLEKLK

# Analysis of the DIO1

## The structural modeling of chicken DIO1

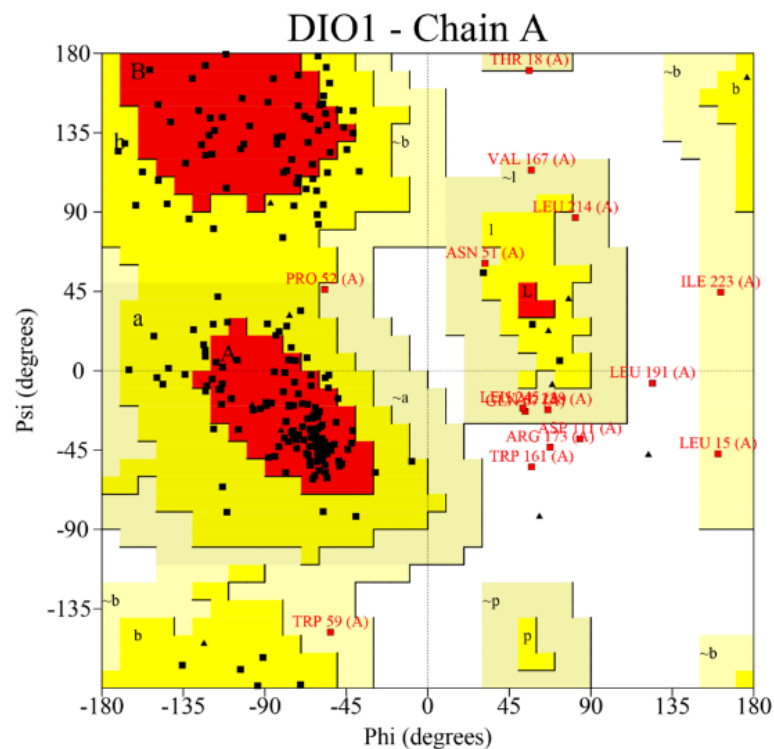

Plot statistics

|                                                      |     |        |
|------------------------------------------------------|-----|--------|
| Residues in most favoured regions [A,B,L]            | 143 | 65.0%  |
| Residues in additional allowed regions [a,b,l,p]     | 63  | 28.6%  |
| Residues in generously allowed regions [-a,-b,-l,-p] | 10  | 4.5%   |
| Residues in disallowed regions                       | 4   | 1.8%   |
| Number of non-glycine and non-proline residues       | 220 | 100.0% |
| Number of end-residues (excl. Gly and Pro)           | 2   |        |
| Number of glycine residues (shown as triangles)      | 11  |        |
| Number of proline residues                           | 13  |        |
| Total number of residues                             | 246 |        |

## Verify 3D

84.82% of the residues had an averaged 3D-1D score  $\geq 0.2$

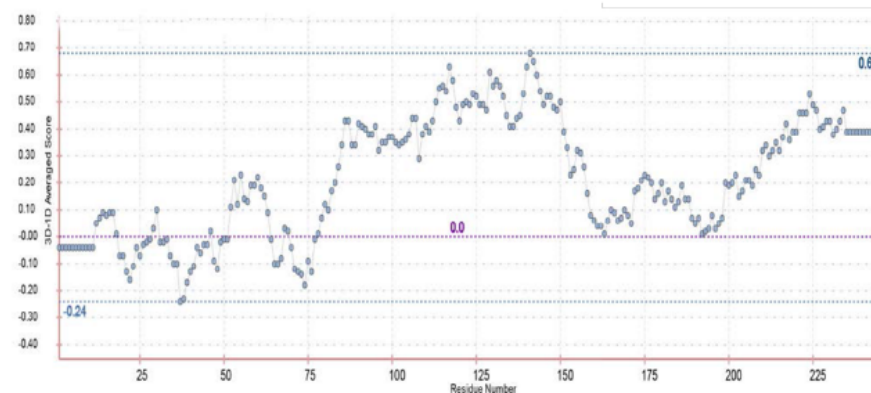

## ERRAT2

Overall quality factor\*\*: 70.168

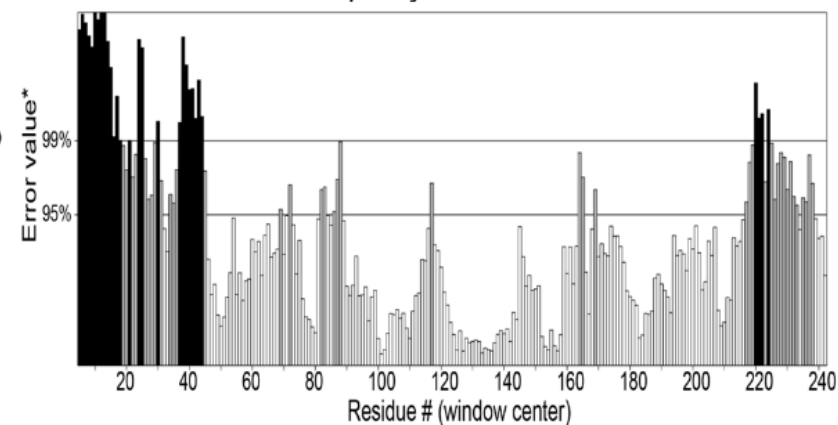

### The predictions of ligand binding sites in chicken DIO1

| Protein | Lig Name | C-score <sup>EC</sup> | Ligand Binding Site Residues           |
|---------|----------|-----------------------|----------------------------------------|
| DIO1    | PER      | 0.10                  | 123, 125, 126, 127, 212                |
|         | GSH      | 0.06                  | 84, 85, 208, 225                       |
|         | 8H8      | 0.04                  | 98, 183, 186, 194                      |
|         | 3GKNA00  | 0.03                  | 124, 125, 126, 154, 155, 156, 157, 165 |
|         | BIH      | 0.03                  | 97, 98, 146, 191, 192, 193             |

1. C-score is the confidence score of the prediction. C-score ranges (0-1), where a higher score indicates a more reliable prediction
2. Lig Name is name of possible binding ligand. The information of binding ligands is shown in PDB

## The predictions of transmembrane helices in chicken DIO1

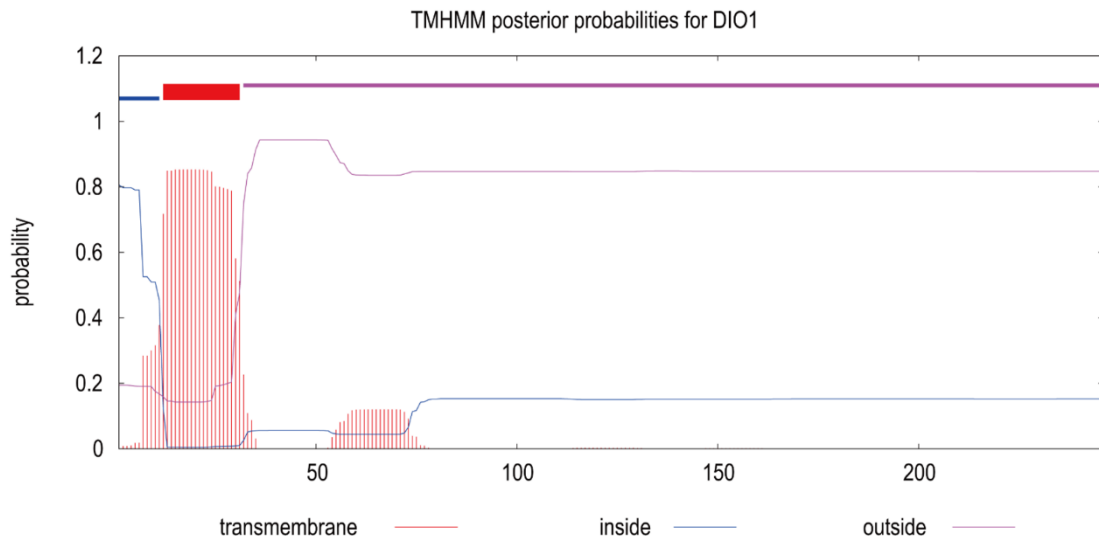

# DIO1 Number of predicted TMHs: 1  
 # DIO1 Exp number of AAs in TMHs: 20.41455  
 # DIO1 Exp number, first 60 AAs: 18.69271  
 # DIO1 Total prob of N-in: 0.80572  
 # DIO1 POSSIBLE N-term signal sequence

|      |          |         |    |     |
|------|----------|---------|----|-----|
| DIO1 | TMHMM2.0 | inside  | 1  | 11  |
| DIO1 | TMHMM2.0 | TMhelix | 12 | 31  |
| DIO1 | TMHMM2.0 | outside | 32 | 246 |

## The accession number and amino acid sequences of chicken

### DIO2

# DIO2 [Gallus gallus]

LOCUS NP\_989445 279 aa linear

VRT 22-MAY-2016

DEFINITION type II iodothyronine deiodinase  
isoform a [Gallus gallus].

ACCESSION NP\_989445

VERSION NP\_989445.2

DBSOURCE REFSEQ: accession NM\_204114.3

KEYWORDS RefSeq.

SOURCE Gallus gallus (chicken)

ORGANISM Gallus gallus

Eukaryota; Metazoa; Chordata;  
Craniata; Vertebrata; Euteleostomi;  
Archelosauria; Archosauria; Dinosauria;  
Saurischia; Theropoda; Coelurosauria;  
Aves; Neognathae; Galloanserae;  
Galliformes; Phasianidae; Phasianinae;  
Gallus.

>NP\_989445.2 type II iodothyronine deiodinase isoform a  
[Gallus gallus]

MGLLSVDLLITLQILPVFFSNCLFLALYDSVILLKHMVLFSL  
RSKSARGEWRRMLTSEGLRCVWNSFLLDAYKQVKLGG  
EAPNSSVIHIAKGNDGSNSSWKS VGGKCGTKCHLLDFA  
NSERPLVVNFGSATUPPFTSQLSAFSKLVEEFSGVADFL  
LVYIDEAHPSDGWAAPGISPSSFVKKHRNQEDRCAAA  
HQLLERFSLPPQCQVADCMDNNANVAYGVSFERVCI  
VRQKIAYLGGKGPFFYNLQEVRLWLEQNFSKRUNPLST  
EDLSTDVSL

# Analysis of the DIO2

## The structural modeling of chicken DIO2

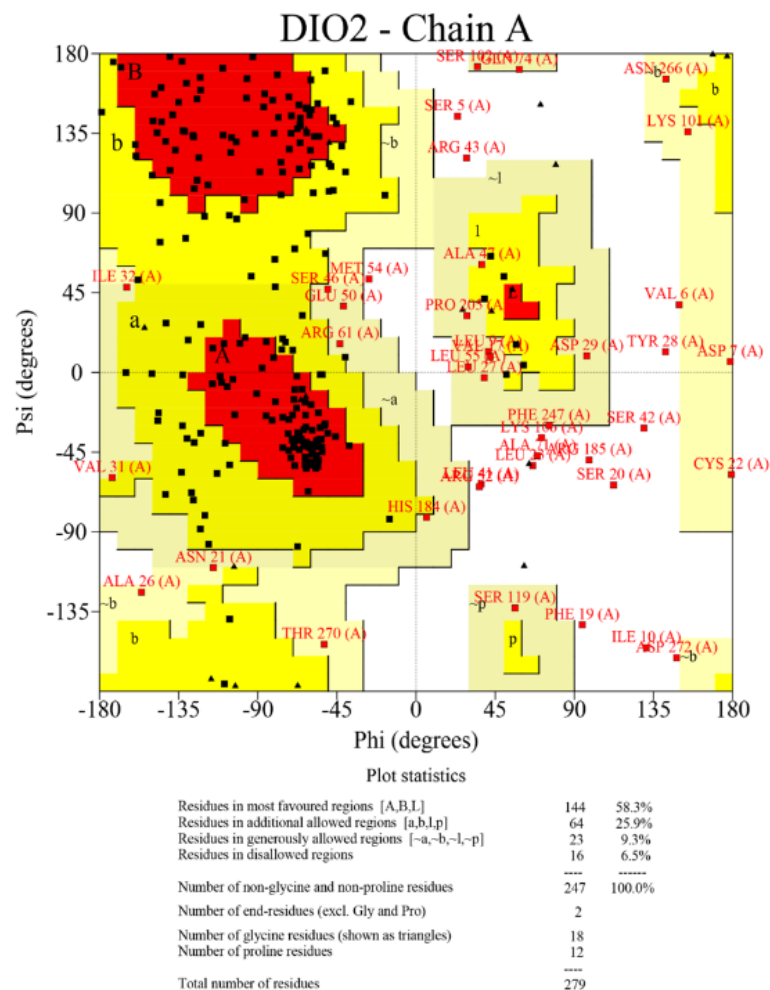

**Verify 3D**  
83.84% of the residues had an averaged 3D-1D score  $\geq 0.2$

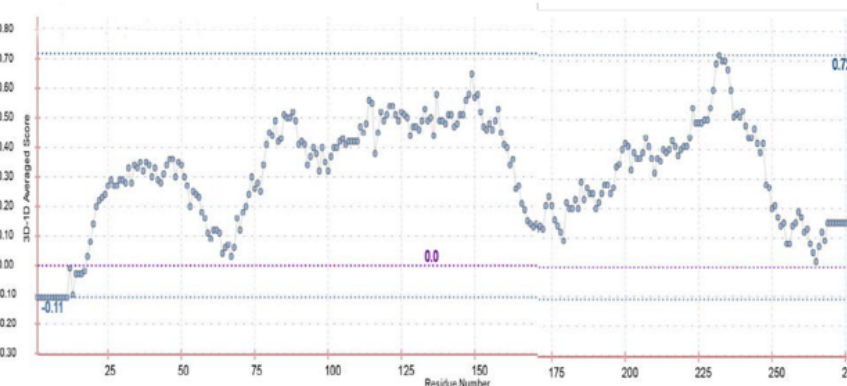

**ERRAT2**  
Overall quality factor\*\*: 73.063

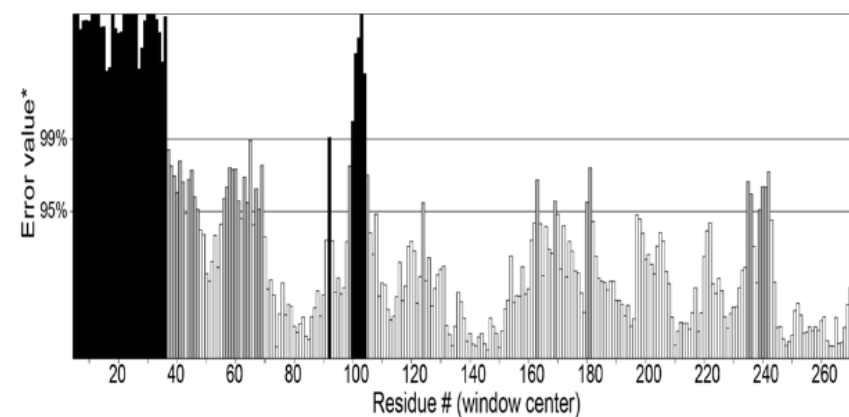

### The predictions of ligand binding sites in chicken DIO2

| Protein | Lig Name | C-score <sup>EC</sup> | Ligand Binding Site Residues      |
|---------|----------|-----------------------|-----------------------------------|
| DIO2    | 3DRNA    | 0.14                  | 131, 132, 133, 134, 163, 164, 226 |
|         | AKG      | 0.04                  | 255, 258                          |
|         | 700      | 0.03                  | 126, 128, 138, 142, 249, 250      |
|         | TS5      | 0.03                  | 131, 132, 134, 225, 226, 227, 250 |
|         | THJ      | 0.03                  | 254, 257                          |

1. C-score is the confidence score of the prediction. C-score ranges (0-1), where a higher score indicates a more reliable prediction
2. Lig Name is name of possible binding ligand. The information of binding ligands is shown in PDB



## The accession number and amino acid sequences of chicken

### DIO3

# DIO3 [*Gallus gallus*]

LOCUS NP\_001116120 274 aa linear  
VRT 28-JUN-2016  
DEFINITION thyroxine 5-deiodinase [*Gallus gallus*].  
ACCESSION NP\_001116120 XP\_426465  
VERSION NP\_001116120.1  
DBSOURCE REFSEQ: accession NM\_001122648.2  
KEYWORDS RefSeq.  
SOURCE *Gallus gallus* (chicken)  
ORGANISM *Gallus gallus*  
Eukaryota; Metazoa; Chordata;  
Craniata; Vertebrata; Euteleostomi;  
Archelosauria; Archosauria; Dinosauria;  
Saurischia; Theropoda; Coelurosauria;  
Aves; Neognathae; Galloanserae;  
Galliformes; Phasianidae; Phasianinae;  
*Gallus*.

>NP\_001116120.1 thyroxine 5-deiodinase [*Gallus gallus*]  
MLHSLGAHTLQLLTQAAACILLFPRFLLTAVMLWLLDFLCI  
RKKMLTMPTAEEAAGAGEGPPPDDPPVCVSDSNRMFT  
LESLKAVWHGQKLDFFKSAHVGSPAPNPEVIQLDGQKR  
LRILDFARGKRPLILNFGSCTUPPFMARLRSFRRLAAHF  
VDIADFLLVYIEEAHPDSDGWVSSDAAYSIPKHQCLQDRL  
RAAQLMREGAPDCPLAVDTMDNASSAAYGAYFERLYVI  
QEEKVMYQGGRGPEGYKISELRSWLDQYKTRLQSPGA  
VVIQV

# Analysis of the DIO3

## The structural modeling of chicken DIO3

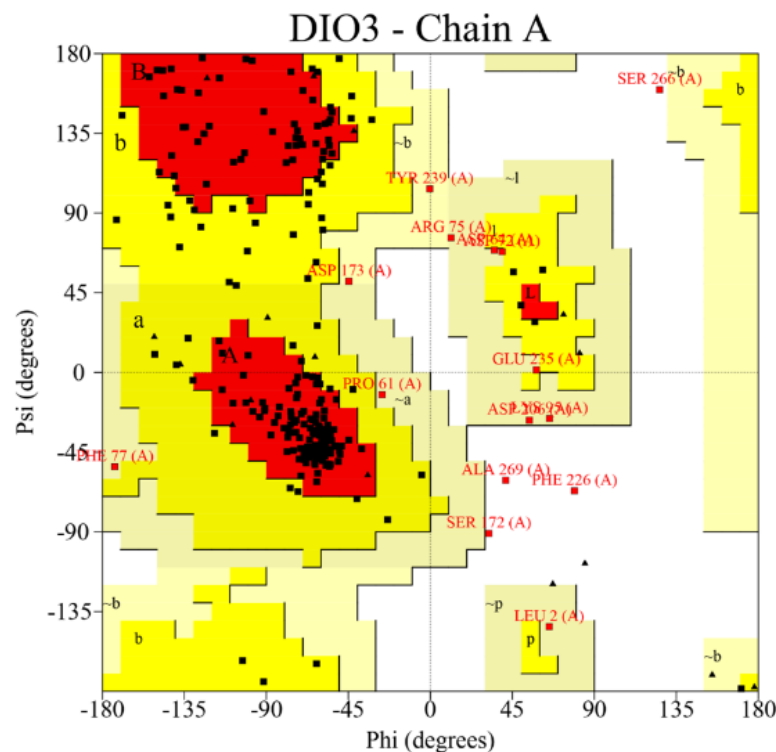

Plot statistics

|                                                      |     |        |
|------------------------------------------------------|-----|--------|
| Residues in most favoured regions [A,B,L]            | 180 | 76.3%  |
| Residues in additional allowed regions [a,b,l,p]     | 42  | 17.8%  |
| Residues in generously allowed regions [-a,-b,-l,-p] | 10  | 4.2%   |
| Residues in disallowed regions                       | 4   | 1.7%   |
| Number of non-glycine and non-proline residues       | 236 | 100.0% |
| Number of end-residues (excl. Gly and Pro)           | 2   |        |
| Number of glycine residues (shown as triangles)      | 17  |        |
| Number of proline residues                           | 19  |        |
| Total number of residues                             | 274 |        |

## Verify 3D

85.18% of the residues had an averaged 3D-1D score  $\geq 0.2$

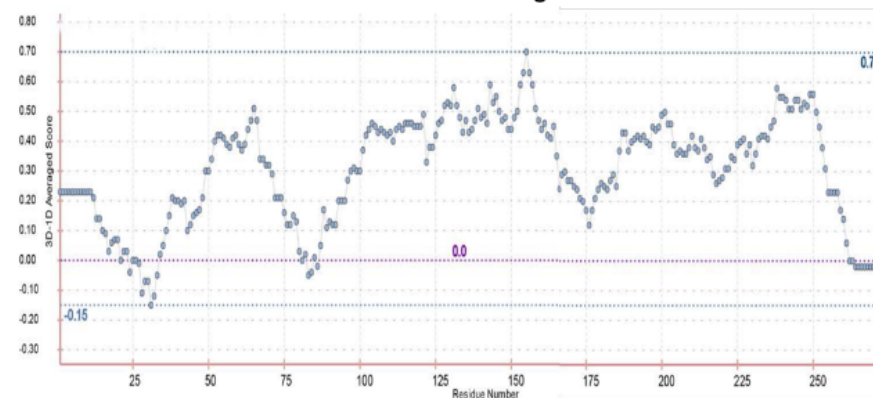

## ERRAT2

Overall quality factor\*\*: 81.509

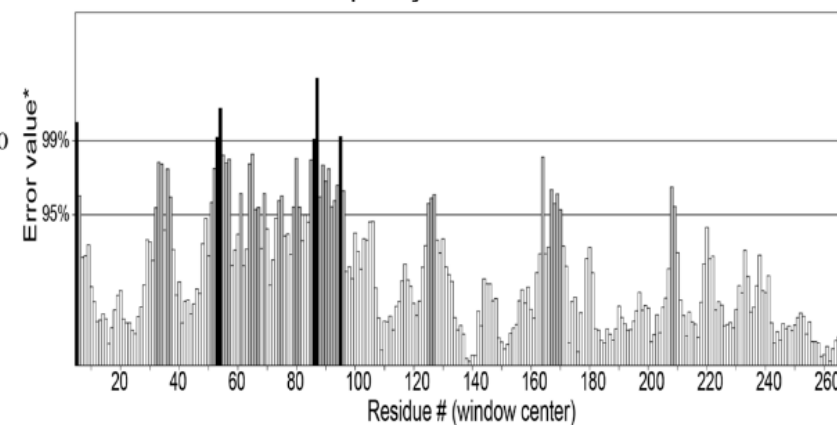

### The predictions of ligand binding sites in chicken DIO3

| Protein | Lig Name | C-score <sup>EC</sup> | Ligand Binding Site Residues      |
|---------|----------|-----------------------|-----------------------------------|
| DIO3    | GSH      | 0.16                  | 137, 138, 140, 227                |
|         | GSH      | 0.06                  | 97, 98, 223, 240                  |
|         | BIH      | 0.03                  | 111, 160, 206, 207, 208           |
|         | TS5      | 0.03                  | 137, 138, 140, 225, 226, 227, 249 |
|         | COM      | 0.03                  | 119, 221, 222, 230, 232           |

1. C-score is the confidence score of the prediction. C-score ranges (0-1), where a higher score indicates a more reliable prediction
2. Lig Name is name of possible binding ligand. The information of binding ligands is shown in PDB

## The predictions of transmembrane helices in chicken DIO3

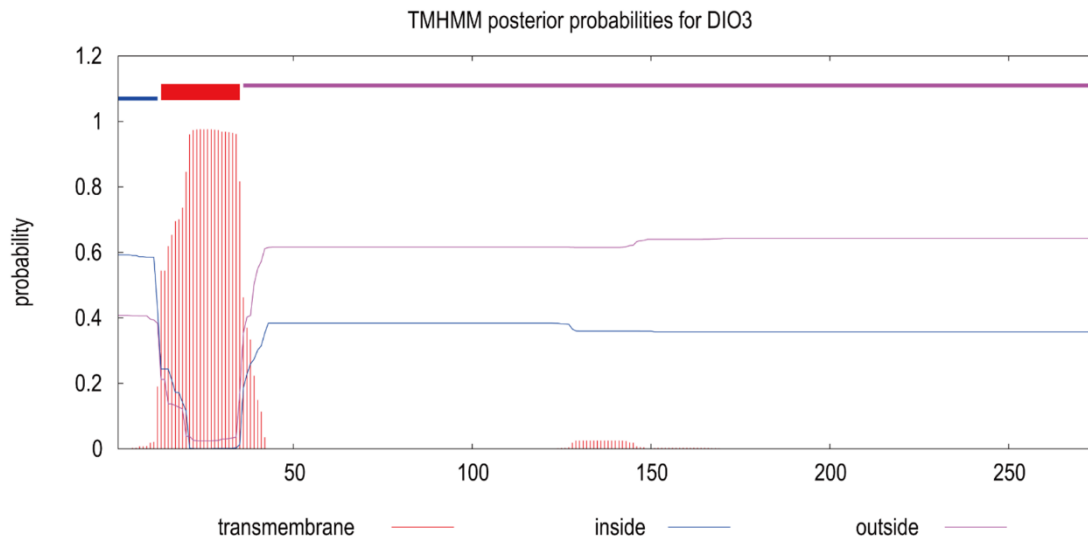

# DIO3 Number of predicted TMHs: 1  
 # DIO3 Exp number of AAs in TMHs: 22.21104  
 # DIO3 Exp number, first 60 AAs: 21.69484  
 # DIO3 Total prob of N-in: 0.59249  
 # DIO3 POSSIBLE N-term signal sequence

|      |          |         |    |     |
|------|----------|---------|----|-----|
| DIO3 | TMHMM2.0 | inside  | 1  | 12  |
| DIO3 | TMHMM2.0 | TMhelix | 13 | 35  |
| DIO3 | TMHMM2.0 | outside | 36 | 274 |

## The accession number and amino acid sequences of chicken

### TrxR1

# TrxR1 [Gallus gallus]

LOCUS NP\_001025933 499 aa linear

VRT 10-FEB-2016

DEFINITION thioredoxin reductase 1, cytoplasmic  
[Gallus gallus].

ACCESSION NP\_001025933 XP\_416317

VERSION NP\_001025933.2

DBSOURCE REFSEQ: accession NM\_001030762.2

KEYWORDS RefSeq.

SOURCE Gallus gallus (chicken)

ORGANISM Gallus gallus

Eukaryota; Metazoa; Chordata;  
Craniata; Vertebrata; Euteleostomi;  
Archelosauria; Archosauria; Dinosauria;  
Saurischia; Theropoda; Coelurosauria;  
Aves; Neognathae; Galloanserae;  
Galliformes; Phasianidae; Phasianinae;  
Gallus.

>NP\_001025933.2 thioredoxin reductase 1, cytoplasmic [Gallus gallus]  
MNGHTAVPHSYDYDLIVIGGGSGGLAAAKEAAKYEEKVMVLDFVTPTPL  
GNSWGLGGTCVNVGCIPKKLMHQAALLGQALQDSRKFGWQFTEEVK  
HNWMTMTESVQNYIGSLNWGYRVALREKKVTYENAYGEFVGPHTVKA  
TNKRGVEKLYTAERFLIATGERPRYLGI PGDKEYCISDDLFSLPYCPGK  
TLVVGASYVALECAGFLAGLGLDVTVMVRSILLRGFDQDMANKIGEYME  
EHGIKFIREFVPIKVEQIEEGTPGRLKVTA KSTKDDQVIEEEYNTVLLAIG  
RDACTRKIGLDKVGKINEKTGKIPVDDMEQTNVPYIYAIGDILQDRLELT  
PVAIQAGRLLVQRLYAGSTLKC DYVNVPTTVFTPLEYGACGYSEENAIQ  
KFGEENIEVYHSHFWPLEWTVPSRDNNKCYAKIICNIQDNQRVIGFHV  
LGP NAGEVTQGFAAAMKCGLT KDQLDSTIGIHPVCAEVFTTLSITKRS  
GENTLQSGCUG

# Analysis of the TrxR1

## The structural modeling of chicken TrxR1

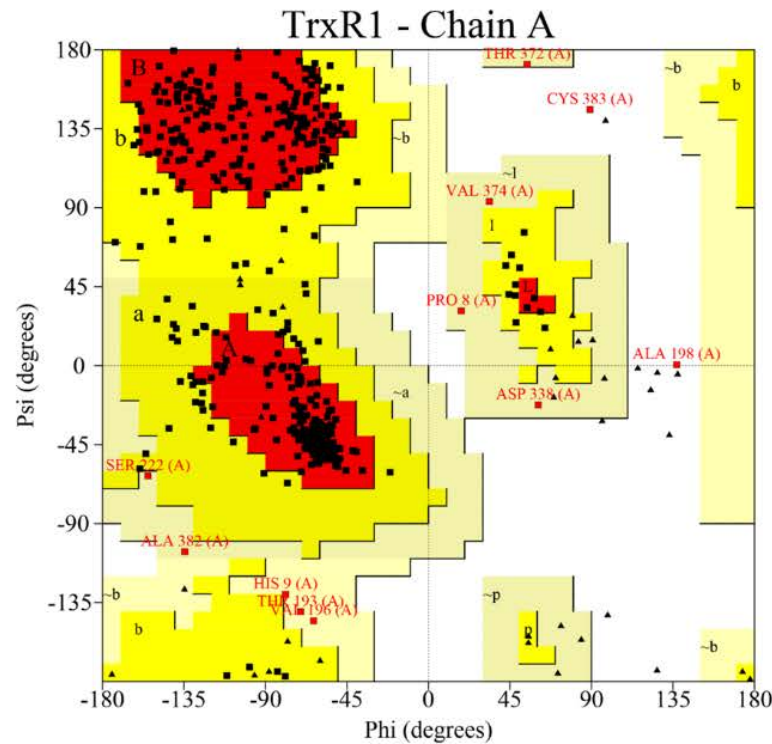

## Verify 3D

87.78% of the residues had an averaged 3D-1D score  $\geq 0.2$

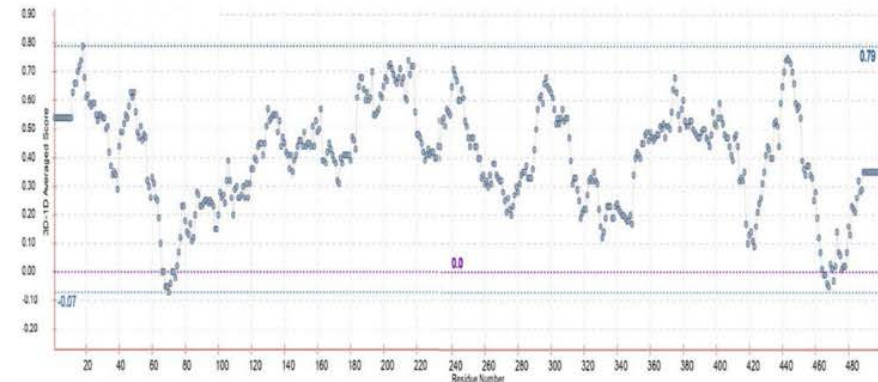

## ERRAT2

Overall quality factor<sup>\*\*</sup>: 93.673

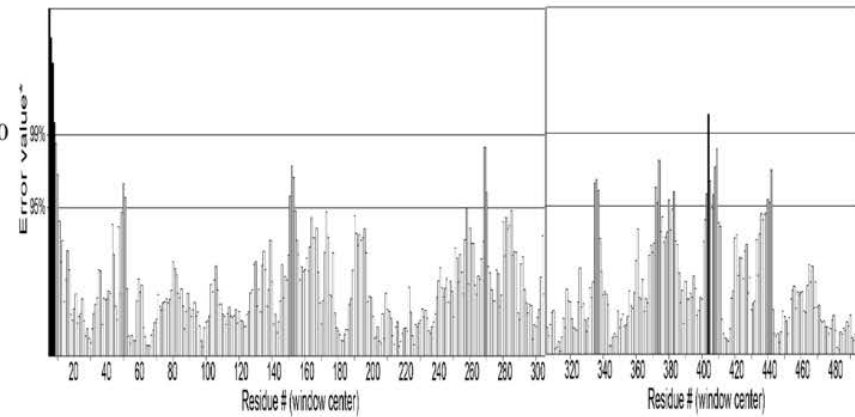

### The predictions of ligand binding sites in chicken TrxR1

| Protein | Lig Name | C-score <sup>EC</sup> | Ligand Binding Site Residues                                                                                                                                          |
|---------|----------|-----------------------|-----------------------------------------------------------------------------------------------------------------------------------------------------------------------|
| TrxR1   | FAD      | 0.98                  | 18, 19, 21, 22, 23, 41, 42, 43, 44, 57, 58,<br>59, 61, 62, 63, 64, 68, 130, 131, 132, 160,<br>161, 162, 180, 201, 293, 296, 333, 334,<br>341, 342, 343, 344, 346, 375 |
|         | NAP      | 0.43                  | 67, 168, 196, 197, 198, 199, 200, 204, 221,<br>222, 226, 252, 290, 291, 292, 293, 341,<br>342, 373                                                                    |
|         | CA6      | 0.07                  | 21, 22, 25, 26, 29, 30, 33, 56, 60, 63, 64,<br>65, 112, 113, 123, 343, 347                                                                                            |
|         | NAP      | 0.06                  | 166, 168, 197, 198, 199, 221, 222, 223,<br>226, 252, 291, 292, 293, 315, 341                                                                                          |
|         | WPF      | 0.06                  | 22, 25, 26, 29, 56, 116, 119, 120, 125, 347                                                                                                                           |

1. C-score is the confidence score of the prediction. C-score ranges (0-1), where a higher score indicates a more reliable prediction
2. Lig Name is name of possible binding ligand. The information of binding ligands is shown in PDB

## The accession number and amino acid sequences of chicken

### TrxR2

# TrxR2 [Gallus gallus]

LOCUS NP\_001116163 518 aa linear  
VRT 05-MAY-2012  
DEFINITION thioredoxin reductase 2, mitochondrial  
[Gallus gallus].  
ACCESSION NP\_001116163 XP\_415076  
VERSION NP\_001116163.1  
DBSOURCE REFSEQ: accession NM\_001122691.1  
KEYWORDS RefSeq.  
SOURCE Gallus gallus (chicken)  
ORGANISM Gallus gallus  
Eukaryota; Metazoa; Chordata;  
Craniata; Vertebrata; Euteleostomi;  
Archelosauria; Archosauria; Dinosauria;  
Saurischia; Theropoda; Coelurosauria;  
Aves; Neognathae; Galloanserae;  
Galliformes; Phasianidae; Phasianinae;  
Gallus.

>NP\_001116163.1 thioredoxin reductase 2, mitochondrial [Gallus gallus]

MAALWRRGERFLGVPGLCRTARALSGKKEYDLLVIGGGSGGL  
ACAKEAAQFGKNVAVLDYVEPSPRGTKWGLGGTCVNVGCIPK  
KLMHQAALLGGALKDAQHYGWSVAHPVHHNWSVMAQAVQN  
YVKSLNWDGHRVQLQDKKVKYFNMKGSFSDSHTVCGIAKGGK  
ETTLTAEKIVATGGRPKYPHTITGALEYGITSDDLFWLKDSPGK  
TLVVGASYVSLECAFLTIGLDTTVIMRIIMRSIPLRGFDQQMA  
SLVTEHMESYGTKFLKKCVPAKVEKLESSRLQVTWKNTLGT  
ETDSFDTVMWAVGRVPDIKTLNLDSVGKTNSETGKIIVDASEA  
TSVPHIYAIGDITEGRPELTPTAIAAGKLLARRLFGHSSELMDDYD  
NVPTTVFTPLEYGCVGLSEEKAVQCYGSDNVEVFHAYYKPLEF  
TVAERDAAQCYIKMVCLREREQRILGLHFIGPNAGEVIQGFALG  
IKCGATYPQLMKTIGIHPTCAEEITKLHITKRSGLDATVTGCUG



# Analysis of the TrxR2

## The structural modeling of chicken TrxR2

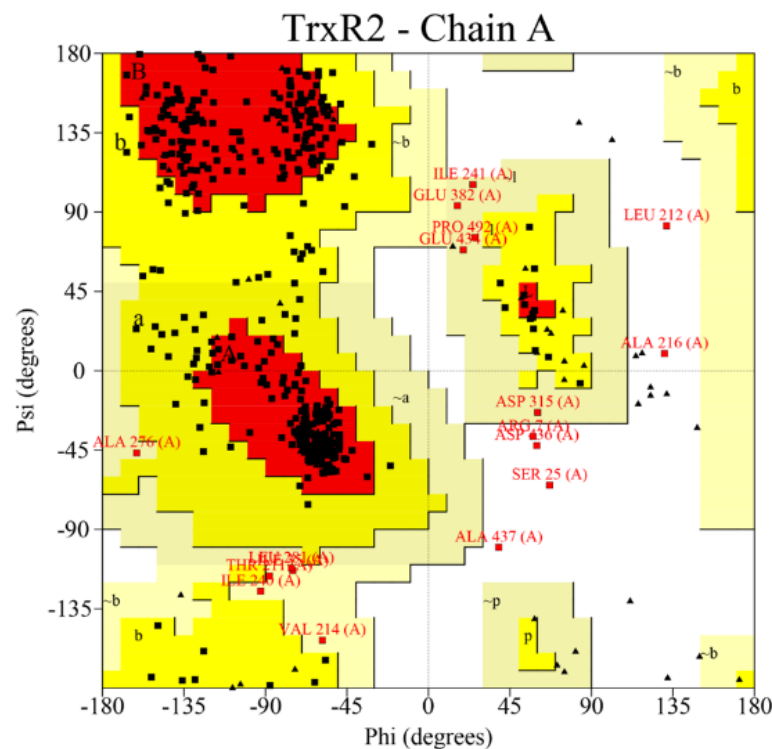

Plot statistics

|                                                      |     |        |
|------------------------------------------------------|-----|--------|
| Residues in most favoured regions [A,B,L]            | 352 | 79.6%  |
| Residues in additional allowed regions [a,b,l,p]     | 74  | 16.7%  |
| Residues in generously allowed regions [-a,-b,-l,-p] | 10  | 2.3%   |
| Residues in disallowed regions                       | 6   | 1.4%   |
| Number of non-glycine and non-proline residues       | 442 | 100.0% |
| Number of end-residues (excl. Gly and Pro)           | 1   |        |
| Number of glycine residues (shown as triangles)      | 55  |        |
| Number of proline residues                           | 20  |        |
| Total number of residues                             | 518 |        |

## Verify 3D

87.07% of the residues had an averaged 3D-1D score  $\geq 0.2$

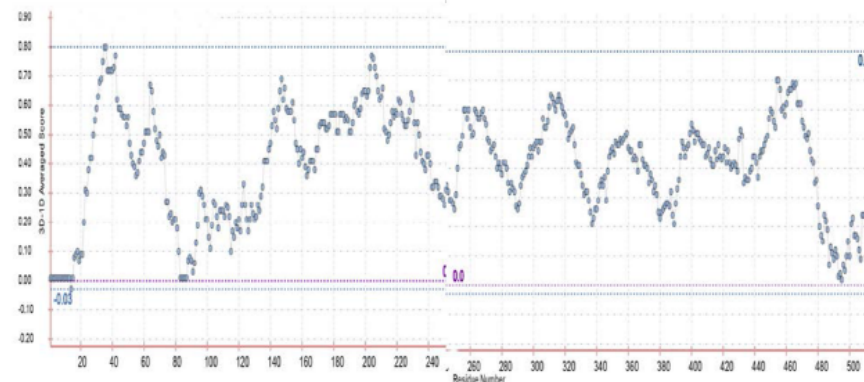

## ERRAT2

Overall quality factor<sup>\*\*</sup>: 93.651

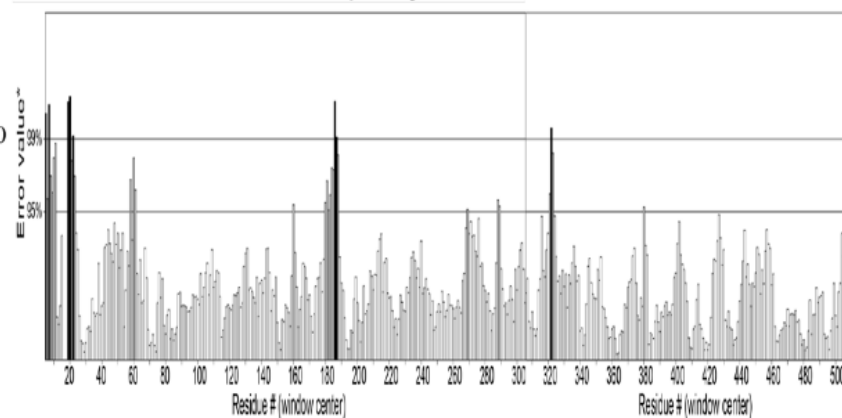

### The predictions of ligand binding sites in chicken TrxR2

| Protein | Lig Name | C-score <sup>EC</sup> | Ligand Binding Site Residues                                                                                                                                          |
|---------|----------|-----------------------|-----------------------------------------------------------------------------------------------------------------------------------------------------------------------|
| TrxR2   | FAD      | 0.99                  | 35, 36, 38, 39, 40, 58, 59, 60, 61, 74, 75,<br>76, 78, 79, 80, 81, 85, 147, 148, 149, 177,<br>178, 179, 198, 219, 312, 315, 352, 353,<br>360, 361, 362, 363, 365, 394 |
|         | NAP      | 0.23                  | 84, 185, 214, 215, 216, 217, 218, 219, 222,<br>239, 244, 248, 274, 309, 310, 312, 360,<br>361, 392                                                                    |
|         | CA6      | 0.05                  | 38, 39, 42, 43, 46, 47, 50, 73, 77, 80, 81,<br>82, 129, 130, 140, 362, 366                                                                                            |
|         | NDP      | 0.04                  | 84, 185, 214, 215, 216, 217, 218, 219, 222,<br>238, 239, 248, 274, 309, 310, 311, 312,<br>360, 361, 392, 394                                                          |
|         | WPF      | 0.03                  | 39, 42, 43, 46, 73, 133, 137, 142, 366                                                                                                                                |

1. C-score is the confidence score of the prediction. C-score ranges (0-1), where a higher score indicates a more reliable prediction
2. Lig Name is name of possible binding ligand. The information of binding ligands is shown in PDB

## The accession number and amino acid sequences of chicken

### TrxR3

# TrxR3 [Gallus gallus]

LOCUS NP\_001116249 606 aa linear  
VRT 10-FEB-2016  
DEFINITION thioredoxin reductase 3 [Gallus gallus].  
ACCESSION NP\_001116249 XP\_414371  
VERSION NP\_001116249.1  
DBSOURCE REFSEQ: accession NM\_001122777.1  
KEYWORDS RefSeq.  
SOURCE Gallus gallus (chicken)  
ORGANISM Gallus gallus  
Eukaryota; Metazoa; Chordata;  
Craniata; Vertebrata; Euteleostomi;  
Archelosauria; Archosauria; Dinosauria;  
Saurischia; Theropoda; Coelurosauria;  
Aves; Neognathae; Galloanserae;  
Galliformes; Phasianidae; Phasianinae;  
Gallus.

>NP\_001116249.1 thioredoxin reductase 3 [Gallus gallus]  
MPPPGQTQLPDWDGLKLRVRTLIATHRVMIFSKSYCPYCHRVKELFSSL  
GVQYYALELDVTDDGPSIQQVLAELTNQRTVPNVFINGKHIGGCATYK  
AYENGTQLRILGDVKDAETYDYDLIVIGGGSGGLACSKEAATLGKKVMV  
LDYVVPTPLGTSWGLGGTCVNVGCIPKKLMHQAALLGQALKDSRAYG  
WQYDEQVKHNWEIMVEAVQNYIGSLNWGYRLSLREKSVTYQNSYGEF  
VEPHKIKATNRKGQVITYHTAETFLATGERPRYLGIPGDKEYCITSDDL  
SLPYCPGKTLVVGASYVALECAGFLAGLGLDVTVMVRSILLRGFDQEMA  
EKIGAHMETHGVTFIRKVVPTQVERLEDGTPGRLKVTAKSTEGPEFFEG  
EYNTVLIAIGRDACTRNIGLQTIGVKINEKNGKVPVNDERTNPVYVYAIG  
DILDGKLELTPVAIQAGKLLARRLYGGSSSTKCDYINVPTTVFTPLEYGSC  
GLAEEKAIEEYGKQNLVYHSLFWPLEWTVPGRDNNTCYAKIICNKLDG  
NRVVG FHVLPNAGEVTQGFAAAIKCGLTKELLDETIGIHPTCAEVFTTM  
DITKSSGQDITQRCUG

# Analysis of the TrxR3

## The structural modeling of chicken TrxR3

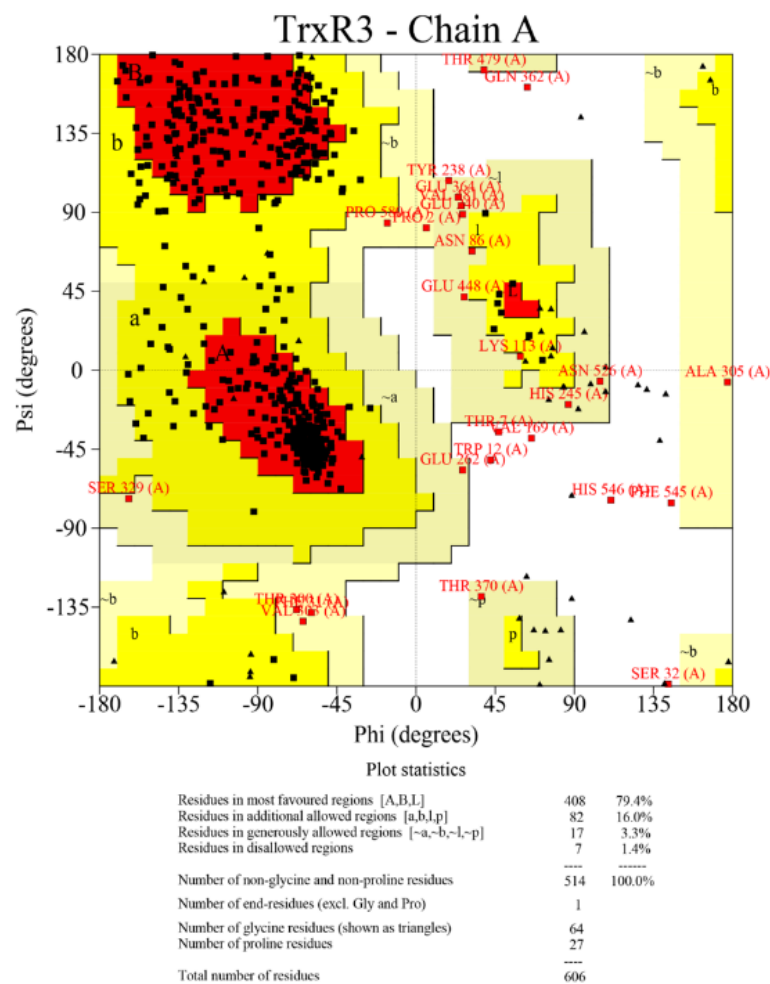

## Verify 3D

88.94% of the residues had an averaged 3D-1D score  $\geq 0.2$

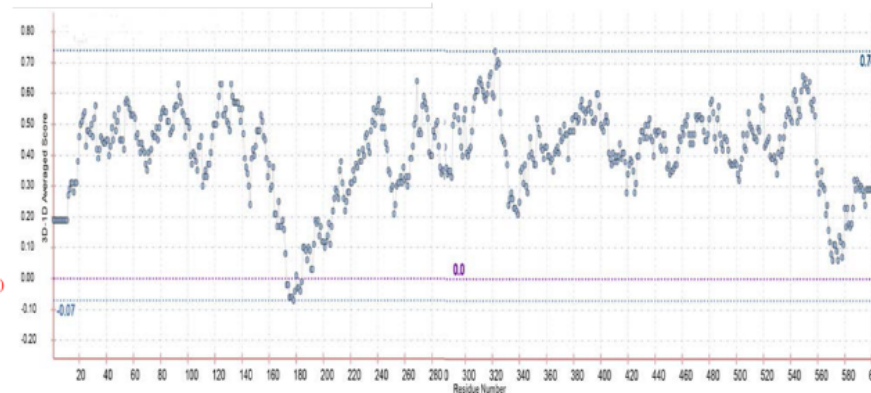

## ERRAT2

Overall quality factor<sup>\*\*</sup>: 90.117

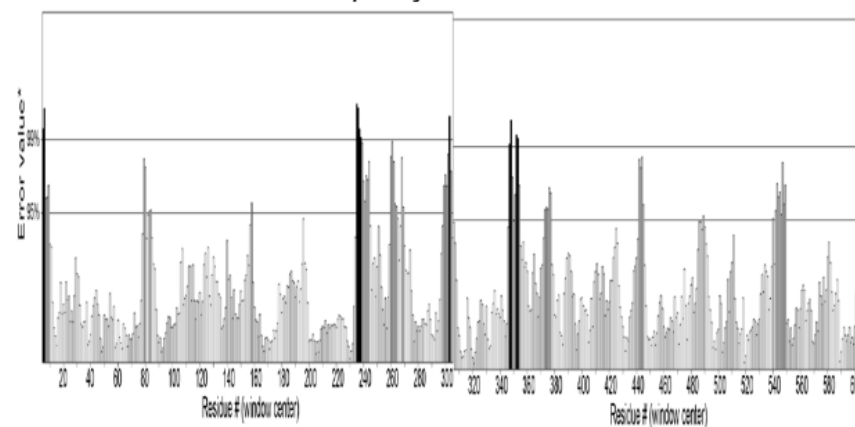

### The predictions of ligand binding sites in chicken TrxR3

| Protein | Lig Name | C-score <sup>EC</sup> | Ligand Binding Site Residues                                                                                                                                                              |
|---------|----------|-----------------------|-------------------------------------------------------------------------------------------------------------------------------------------------------------------------------------------|
| TrxR3   | FAD      | 0.96                  | 125, 126, 128, 129, 130, 148, 149, 150,<br>151, 164, 165, 166, 168, 169, 170, 171,<br>175, 237, 238, 239, 267, 268, 269, 287,<br>308, 400, 403, 440, 441, 448, 449, 450,<br>451, 453, 482 |
|         | NAP      | 0.14                  | 273, 275, 304, 305, 328, 329, 330, 333,<br>359, 398, 399, 400, 422, 448                                                                                                                   |
|         | NDP      | 0.04                  | 174, 305, 306, 307, 308, 311, 327, 328,<br>329, 333, 359, 397, 398, 399, 400, 448,<br>449, 480, 482                                                                                       |
|         | CA6      | 0.04                  | 128, 129, 132, 133, 136, 137, 140, 163,<br>167, 170, 171, 172, 219, 220, 230, 450,<br>454                                                                                                 |
|         | WPF      | 0.03                  | 129, 132, 133, 136, 163, 167, 223, 226,<br>227, 454                                                                                                                                       |

1. C-score is the confidence score of the prediction. C-score ranges (0-1), where a higher score indicates a more reliable prediction
2. Lig Name is name of possible binding ligand. The information of binding ligands is shown in PDB

## The accession number and amino acid sequences of chicken

Sell

# Sell [Gallus gallus]

LOCUS NP\_001026699 400 aa linear

VRT 08-JUL-2016

DEFINITION ethanolaminephosphotransferase 1

[Gallus gallus].

ACCESSION NP\_001026699 XP\_426219

VERSION NP\_001026699.2

DBSOURCE REFSEQ: accession NM\_001031528.3

KEYWORDS RefSeq.

SOURCE Gallus gallus (chicken)

ORGANISM Gallus gallus

Eukaryota; Metazoa; Chordata;  
Craniata; Vertebrata; Euteleostomi;  
Archelosauria; Archosauria; Dinosauria;  
Saurischia; Theropoda; Coelurosauria;  
Aves; Neognathae; Galloanserae;  
Galliformes; Phasianidae; Phasianinae;  
Gallus.

>NP\_001026699.2 ethanolaminephosphotransferase 1 [Gallus gallus]  
MEYVTAEQLAGFSKYKYSAVDSNPLSLYVMHPFWNTIVKIFPTWLPAPNLI  
TFSGFLLLWFNFFLMAYFDPDFYASAPDHQHPNGVWVWVGLLNFIAYT  
LDGVDGKQARRTNSSTPLGELFDHGLDSWACVYFVTVYSTFGRGST  
GVSFVFLYLLLWVFLFSFILSHWEKYNTGILFLPWGYDISQVTISIVYIVTA  
IVGVEAWYAPFLFNFLYRDLFTTMIIACALTVTLPMSLYNFYKAYKNNTLK  
HHSVYEIMLPLVSPVLLFALCTTWIFVSPMDILEVHPRLFYFMVGTAFAFI  
SCQLIVCQMSSTRCQPLNWMLLPIALVLFMVMSGFAPSSETLLLYLLTAF  
LTLAHIHYGVVVVSQLSRHFNIRPFSLKKPTPDULGMEEEEKISLRSAEVL

# Analysis of the Sell

## The structural modeling of chicken Sell

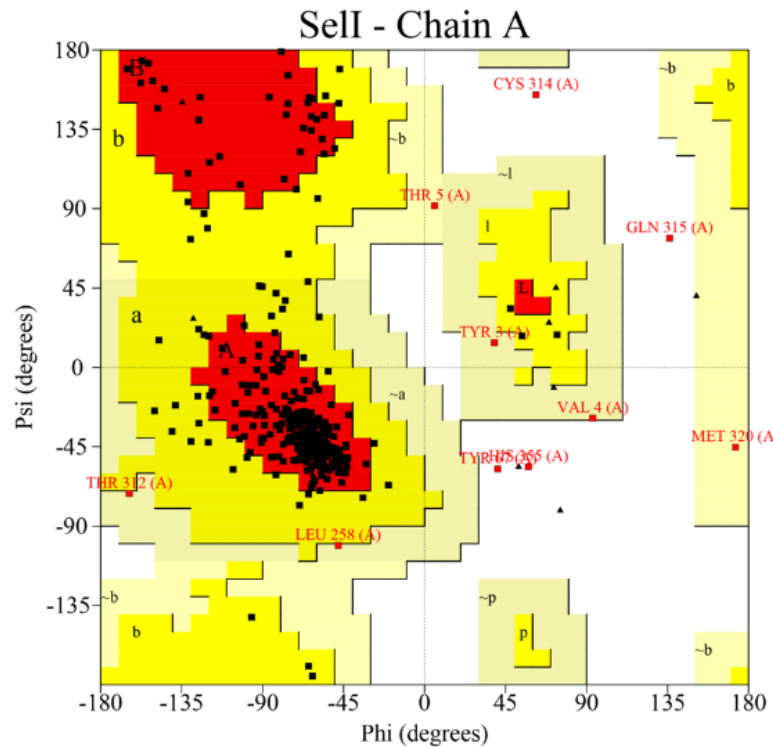

Plot statistics

|                                                      |     |        |
|------------------------------------------------------|-----|--------|
| Residues in most favoured regions [A,B,L]            | 306 | 85.2%  |
| Residues in additional allowed regions [a,b,l,p]     | 43  | 12.0%  |
| Residues in generously allowed regions [-a,-b,-l,-p] | 6   | 1.7%   |
| Residues in disallowed regions                       | 4   | 1.1%   |
| Number of non-glycine and non-proline residues       | 359 | 100.0% |
| Number of end-residues (excl. Gly and Pro)           | 2   |        |
| Number of glycine residues (shown as triangles)      | 18  |        |
| Number of proline residues                           | 21  |        |
| Total number of residues                             | 400 |        |

## Verify 3D

82.25% of the residues had an averaged 3D-1D score  $\geq 0.2$

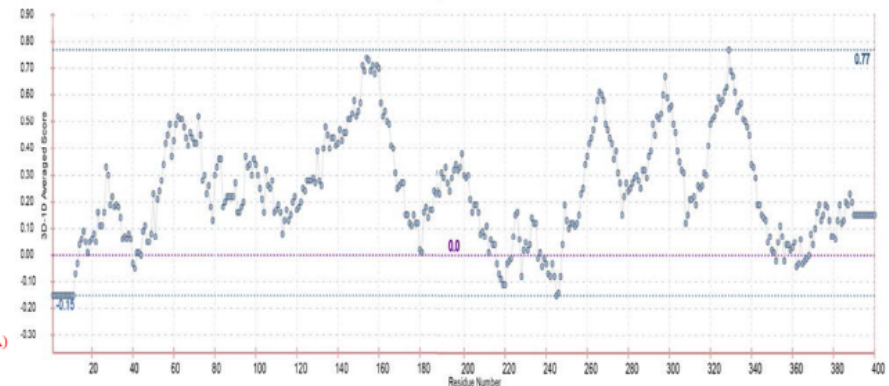

## ERRAT2

Overall quality factor\*\*: 88.520

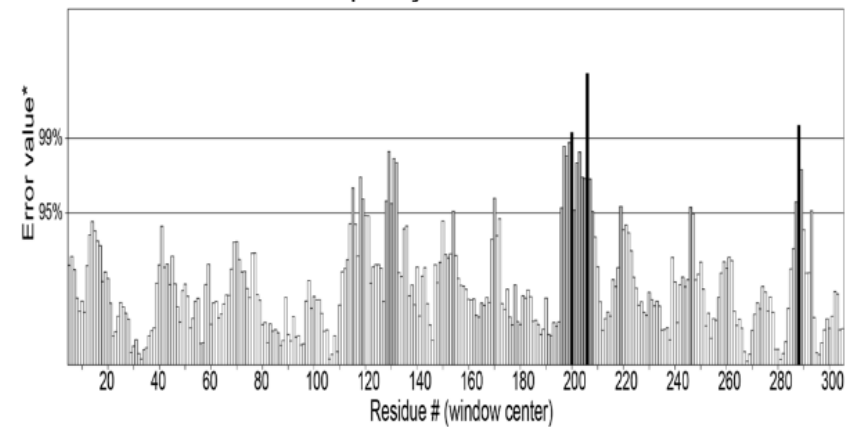

### The predictions of ligand binding sites in chicken Sell

| Protein | Lig Name | C-score <sup>EC</sup> | Ligand Binding Site Residues |
|---------|----------|-----------------------|------------------------------|
| Sell    | MN       | 0.05                  | 48, 51                       |
|         | 8PH      | 0.05                  | 26, 61, 65                   |
|         | CL       | 0.05                  | 120, 123, 261, 262           |
|         | BCL      | 0.05                  | 62, 65                       |
|         | MG       | 0.05                  | 294, 295                     |

1. C-score is the confidence score of the prediction. C-score ranges (0-1), where a higher score indicates a more reliable prediction
2. Lig Name is name of possible binding ligand. The information of binding ligands is shown in PDB



## The predictions of transmembrane helices in chicken Sell

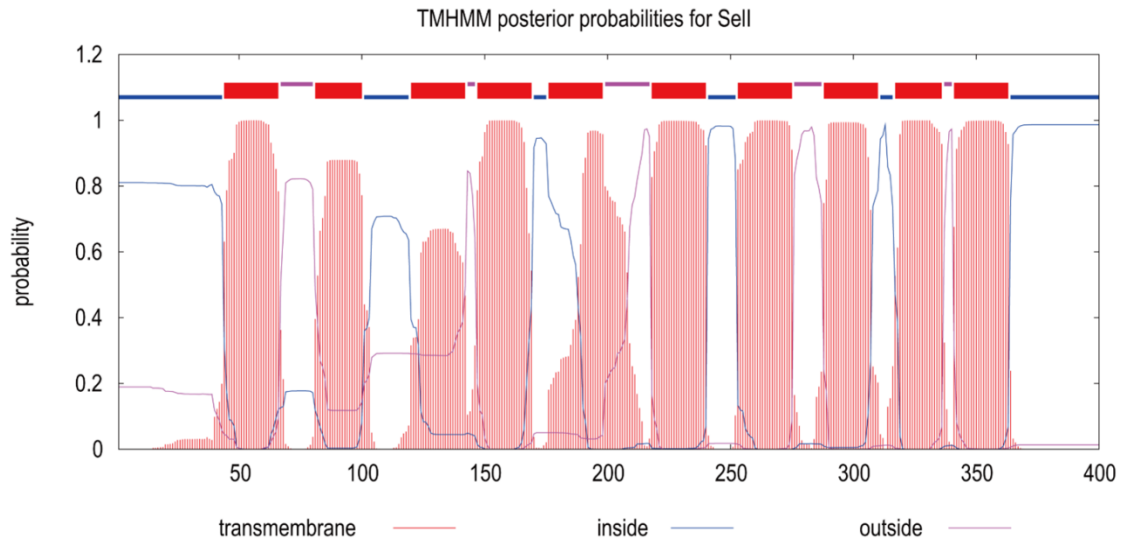

# Sell Number of predicted TMHs: 10  
 # Sell Exp number of AAs in TMHs: 206.19139  
 # Sell Exp number, first 60 AAs: 17.19627  
 # Sell Total prob of N-in: 0.81044  
 # Sell POSSIBLE N-term signal sequence

| Sell | TMHMM2.0 | inside  | 1   | 43  |
|------|----------|---------|-----|-----|
| Sell | TMHMM2.0 | TMhelix | 44  | 66  |
| Sell | TMHMM2.0 | outside | 67  | 80  |
| Sell | TMHMM2.0 | TMhelix | 81  | 100 |
| Sell | TMHMM2.0 | inside  | 101 | 119 |
| Sell | TMHMM2.0 | TMhelix | 120 | 142 |
| Sell | TMHMM2.0 | outside | 143 | 146 |
| Sell | TMHMM2.0 | TMhelix | 147 | 169 |
| Sell | TMHMM2.0 | inside  | 170 | 175 |
| Sell | TMHMM2.0 | TMhelix | 176 | 198 |
| Sell | TMHMM2.0 | outside | 199 | 217 |
| Sell | TMHMM2.0 | TMhelix | 218 | 240 |
| Sell | TMHMM2.0 | inside  | 241 | 252 |
| Sell | TMHMM2.0 | TMhelix | 253 | 275 |
| Sell | TMHMM2.0 | outside | 276 | 287 |
| Sell | TMHMM2.0 | TMhelix | 288 | 310 |
| Sell | TMHMM2.0 | inside  | 311 | 316 |
| Sell | TMHMM2.0 | TMhelix | 317 | 336 |
| Sell | TMHMM2.0 | outside | 337 | 340 |
| Sell | TMHMM2.0 | TMhelix | 341 | 363 |
| Sell | TMHMM2.0 | inside  | 364 | 400 |

## The accession number and amino acid sequences of chicken

### SelS

# SelS [Gallus gallus]

LOCUS NP\_001019905 194 aa linear

VRT 25-AUG-2016

DEFINITION selenoprotein S [Gallus gallus].

ACCESSION NP\_001019905 XP\_413890

VERSION NP\_001019905.1

DBSOURCE REFSEQ: accession NM\_001024734.2

KEYWORDS RefSeq.

SOURCE Gallus gallus (chicken)

ORGANISM Gallus gallus

Eukaryota; Metazoa; Chordata;  
Craniata; Vertebrata; Euteleostomi;  
Archelosauria; Archosauria; Dinosauria;  
Saurischia; Theropoda; Coelurosauria;  
Aves; Neognathae; Galloanserae;  
Galliformes; Phasianidae; Phasianinae;  
Gallus.

>NP\_001019905.1 selenoprotein S [Gallus gallus]

MELGDRGGAGPGPGKPALEREGLELLQHTVGALLSSY  
GWYILLACVAIYLIVQKISPYLRMRPSSQQGATGAAVEPD  
MVVRRQEALLASRLRMQEELNAQAERYKEKQRQLEEQ  
KRRQKIEMWESMQEGKSYKGNLKLSSQQAESGASTSS  
AVPKSKPNKKPLRGGGYNPLSGEGGGTCSWRPGRRG  
PSAGGUG

# Analysis of the Sels

## The structural modeling of chicken Sels

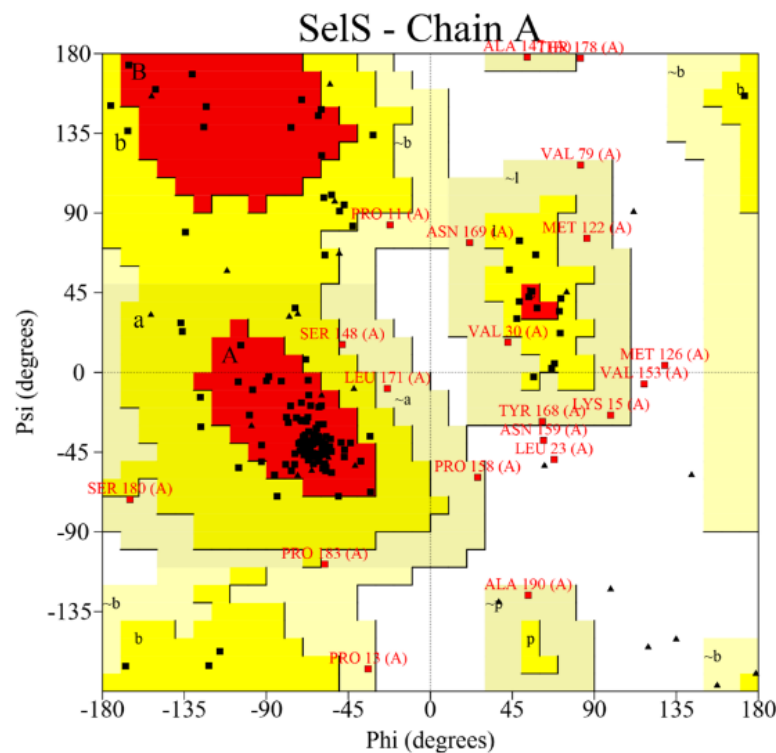

## Verify 3D

82.27% of the residues had an averaged 3D-1D score  $\geq 0.2$

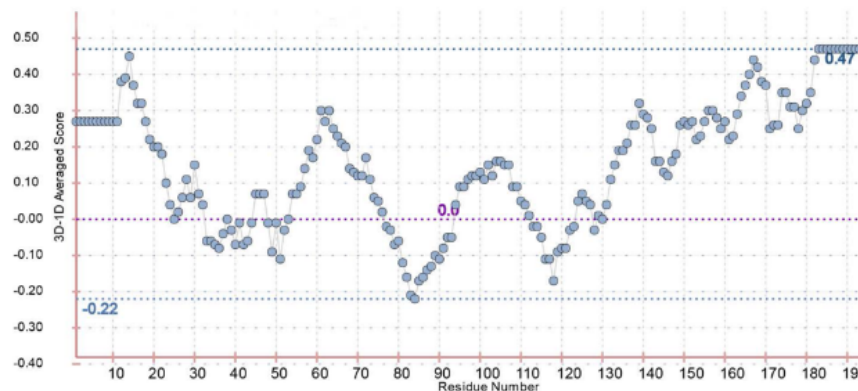

## ERRAT2

Overall quality factor\*\*: 89.247

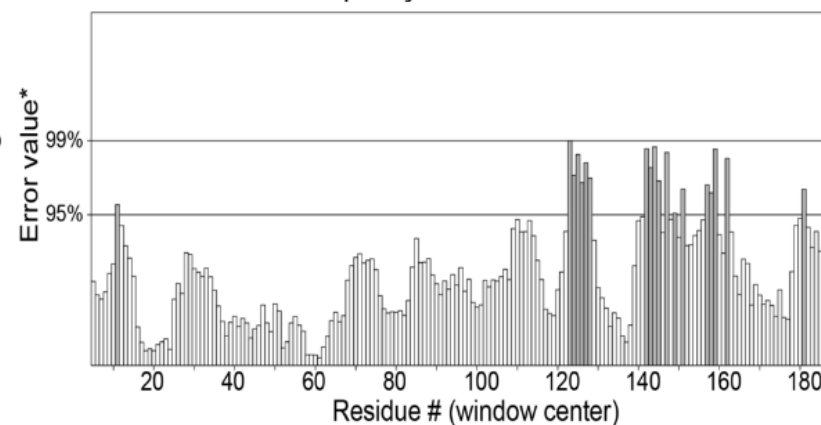

### The predictions of ligand binding sites in chicken SelS

| Protein | Lig Name | C-score <sup>EC</sup> | Ligand Binding Site Residues   |
|---------|----------|-----------------------|--------------------------------|
| SelS    | Nuc.AcId | 0.06                  | 19, 20, 23, 24, 27, 31, 35     |
|         | CA       | 0.06                  | 62, 63, 65, 69, 90             |
|         | FE       | 0.05                  | 30, 33, 121                    |
|         | Nuc.AcId | 0.04                  | 25, 26, 29, 30, 32, 33, 34, 36 |
|         | CPL      | 0.04                  | 52, 54, 103, 104, 106          |

1. C-score is the confidence score of the prediction. C-score ranges (0-1), where a higher score indicates a more reliable prediction
2. Lig Name is name of possible binding ligand. The information of binding ligands is shown in PDB

## The predictions of transmembrane helices in chicken SelS

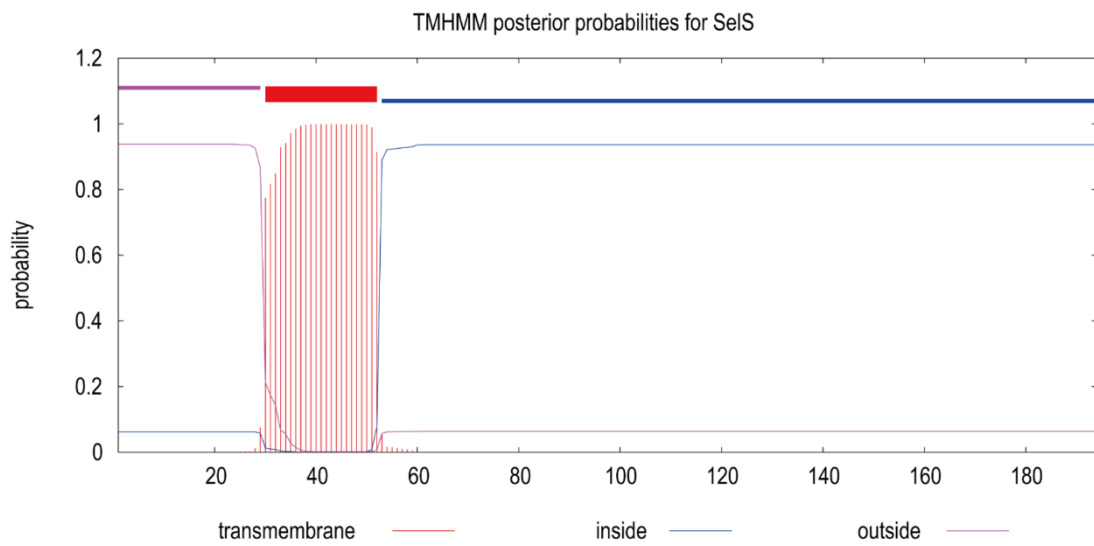

# SelS Number of predicted TMHs: 1  
 # SelS Exp number of AAs in TMHs: 22.35942  
 # SelS Exp number, first 60 AAs: 22.35882  
 # SelS Total prob of N-in: 0.06185  
 # SelS POSSIBLE N-term signal sequence

|      |          |         |    |     |
|------|----------|---------|----|-----|
| SelS | TMHMM2.0 | outside | 1  | 29  |
| SelS | TMHMM2.0 | TMhelix | 30 | 52  |
| SelS | TMHMM2.0 | inside  | 53 | 194 |

## The accession number and amino acid sequences of chicken

### SelK

# SelK [Gallus gallus]

LOCUS NP\_001020612 95 aa linear  
VRT 24-APR-2016  
DEFINITION selenoprotein K [Gallus gallus].  
ACCESSION NP\_001020612 XP\_414337  
VERSION NP\_001020612.1  
DBSOURCE REFSEQ: accession NM\_001025441.2  
KEYWORDS RefSeq.  
SOURCE Gallus gallus (chicken)  
ORGANISM Gallus gallus  
Eukaryota; Metazoa; Chordata;  
Craniata; Vertebrata; Euteleostomi;  
Archelosauria; Archosauria; Dinosauria;  
Saurischia; Theropoda; Coelurosauria;  
Aves; Neognathae; Galloanserae;  
Galliformes; Phasianidae; Phasianinae;  
Gallus.  
>NP\_001020612.1 selenoprotein K [Gallus gallus]  
MVYISNGQVLDNRSRAPWSLSAITDFFWSIADFVVMFFQ  
SIIQPDLRRRGYTSSSYLGQSDGRGPPGNPRRRMGRIN  
HWGGGPPPPMAGGGUGR

# Analysis of the SelK

## The structural modeling of chicken SelK

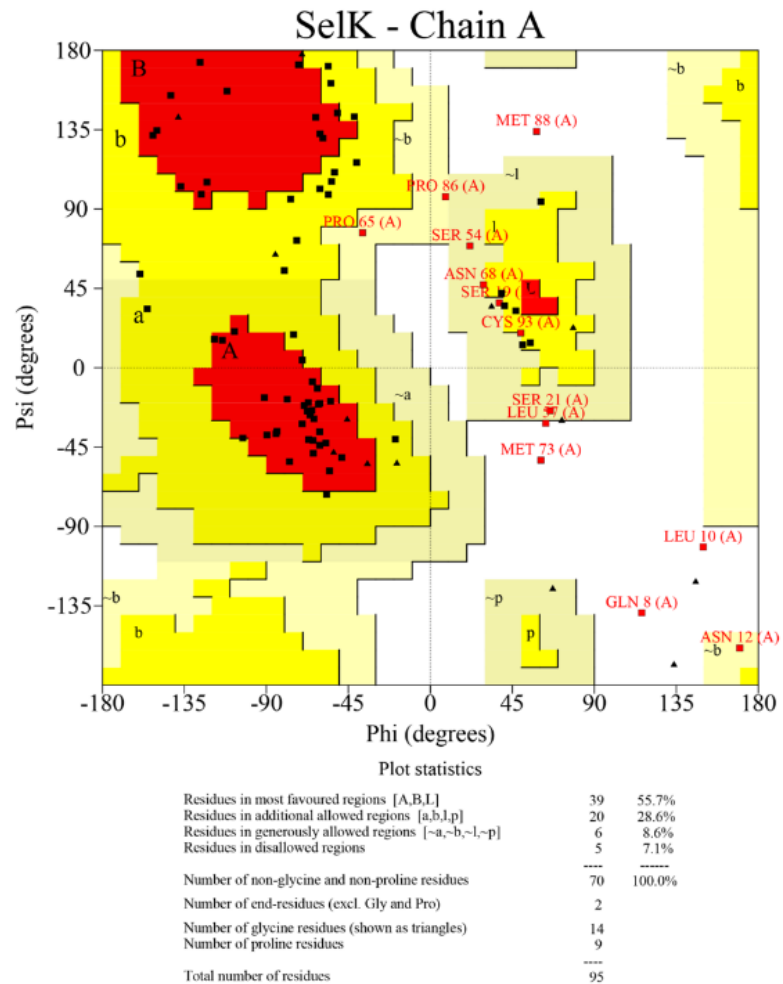

**Verify 3D**  
84.74% of the residues had an averaged 3D-1D score  $\geq 0.2$

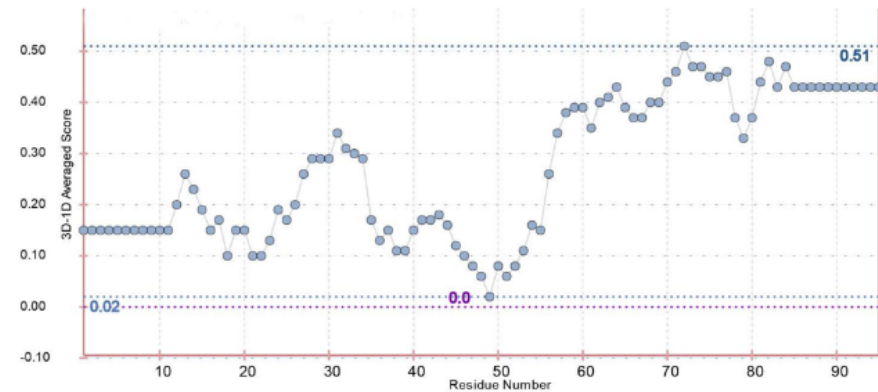

**ERRAT2**  
Overall quality factor\*\*: 76.667

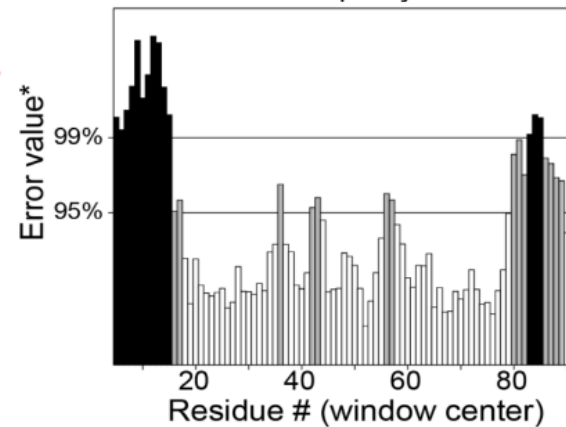

### The predictions of ligand binding sites in chicken SelK

| Protein | Lig Name | C-score <sup>EC</sup> | Ligand Binding Site Residues |
|---------|----------|-----------------------|------------------------------|
| SelK    | 32M      | 0.09                  | 30, 34                       |
|         | CLA      | 0.08                  | 37, 38                       |
|         | BCL      | 0.04                  | 33, 37                       |
|         | EDO      | 0.04                  | 20, 38                       |
|         | IMD      | 0.04                  | 1, 9, 11, 50                 |

1. C-score is the confidence score of the prediction. C-score ranges (0-1), where a higher score indicates a more reliable prediction

2. Lig Name is name of possible binding ligand. The information of binding ligands is shown in PDB



## The predictions of transmembrane helices in chicken SelK

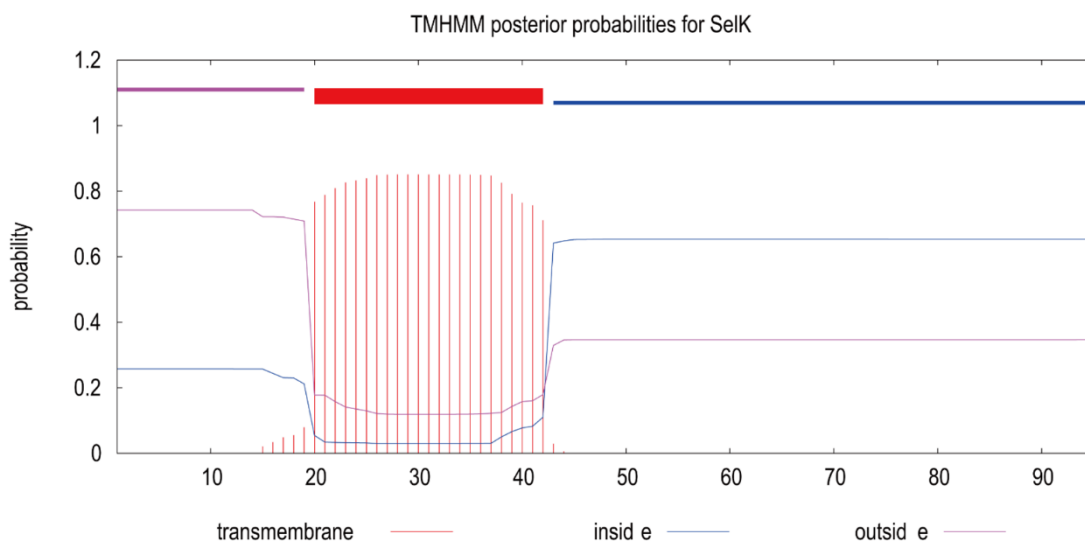

# SelK Number of predicted TMHs: 1  
 # SelK Exp number of AAs in TMHs: 19.19388  
 # SelK Exp number, first 60 AAs: 19.19131  
 # SelK Total prob of N-in: 0.25750  
 # SelK POSSIBLE N-term signal sequence

|      |          |         |    |    |
|------|----------|---------|----|----|
| SelK | TMHMM2.0 | outside | 1  | 19 |
| SelK | TMHMM2.0 | TMhelix | 20 | 42 |
| SelK | TMHMM2.0 | inside  | 43 | 95 |

## The accession number and amino acid sequences of chicken

### SeIT

# SeIT [Gallus gallus]

LOCUS NP\_001006557 199 aa linear

VRT 24-APR-2016

DEFINITION selenoprotein T precursor [Gallus gallus].

ACCESSION NP\_001006557 XP\_422843

VERSION NP\_001006557.3

DBSOURCE REFSEQ: accession NM\_001006557.3

KEYWORDS RefSeq.

SOURCE Gallus gallus (chicken)

ORGANISM Gallus gallus

Eukaryota; Metazoa; Chordata;  
Craniata; Vertebrata; Euteleostomi;  
Archelosauria; Archosauria; Dinosauria;  
Saurischia; Theropoda; Coelurosauria;  
Aves; Neognathae; Galloanserae;  
Galliformes; Phasianidae; Phasianinae;  
Gallus.

>NP\_001006557.3 selenoprotein T precursor [Gallus gallus]

MRAAGLGLGIGLLLLAALAGPGGSAEQGGVPAKKLRMA  
YATGPLLKFQICVSUGYRRVFEEYMRVISQRYPPDIRIEGE  
NYLPQPIYRHIASFLSVFKLVLIIGLIIVGKDPFAFFGMQAP  
SIWQWGQENKVYACMMVFFLSNMIENQCMSTGAFEITL  
NDVPVWSKLESGHLPSMQQLVQILDNEMKLVHMHESM  
PHHRS

# Analysis of the SeIT

## The structural modeling of chicken SeIT

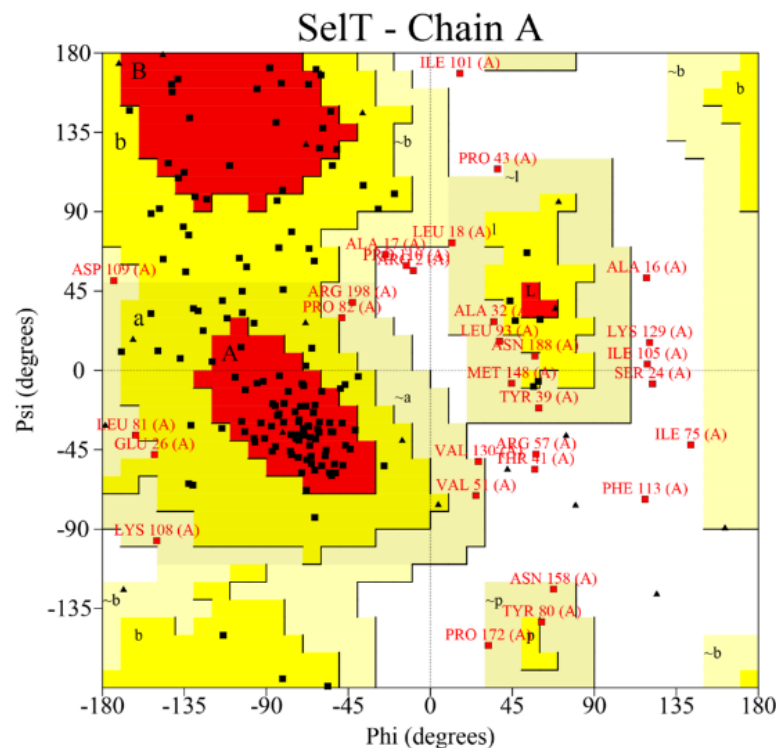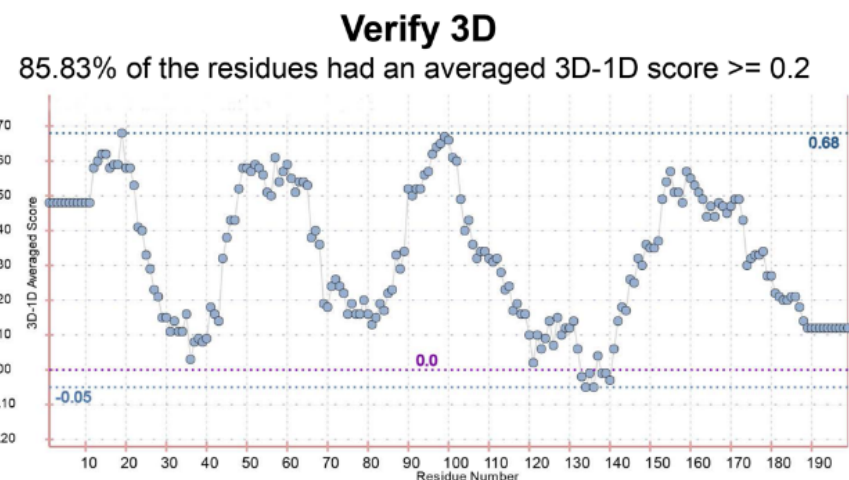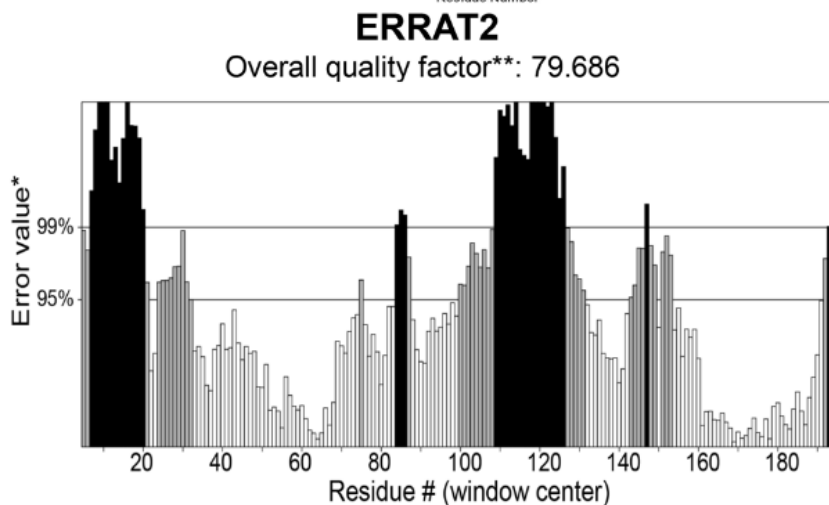

### The predictions of ligand binding sites in chicken SeIT

| Protein | Lig Name | C-score <sup>EC</sup> | Ligand Binding Site Residues                    |
|---------|----------|-----------------------|-------------------------------------------------|
| SeIT    | TFA      | 0.14                  | 153, 163                                        |
|         | A46      | 0.04                  | 97, 98, 132, 136                                |
|         | MG       | 0.03                  | 141, 144                                        |
|         | MG       | 0.03                  | 172, 176                                        |
|         | 1U3AA00  | 0.03                  | 47, 58, 59, 62, 153, 165, 171, 172, 173,<br>177 |

1. C-score is the confidence score of the prediction. C-score ranges (0-1), where a higher score indicates a more reliable prediction
2. Lig Name is name of possible binding ligand. The information of binding ligands is shown in PDB

## The predictions of transmembrane helices in chicken SelT

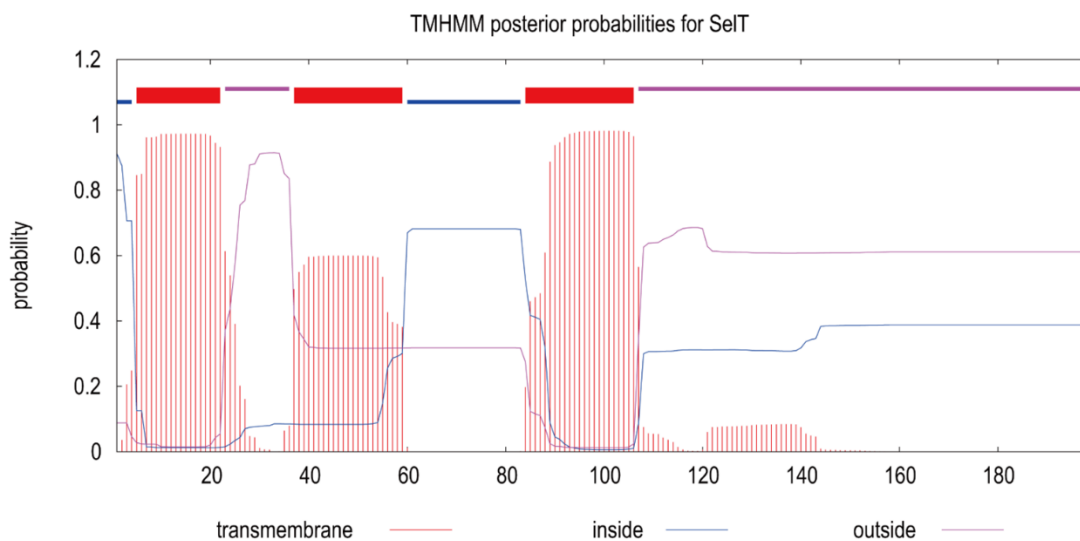

# SelT Number of predicted TMHs: 3  
 # SelT Exp number of AAs in TMHs: 54.95809  
 # SelT Exp number, first 60 AAs: 32.55588  
 # SelT Total prob of N-in: 0.91209  
 # SelT POSSIBLE N-term signal sequence

|      |          |         |     |     |
|------|----------|---------|-----|-----|
| SelT | TMHMM2.0 | inside  | 1   | 4   |
| SelT | TMHMM2.0 | TMhelix | 5   | 22  |
| SelT | TMHMM2.0 | outside | 23  | 36  |
| SelT | TMHMM2.0 | TMhelix | 37  | 59  |
| SelT | TMHMM2.0 | inside  | 60  | 83  |
| SelT | TMHMM2.0 | TMhelix | 84  | 106 |
| SelT | TMHMM2.0 | outside | 107 | 199 |

## The accession number and amino acid sequences of chicken

### SeIN

# SeIN [Gallus gallus]

LOCUS NP\_001108444 530 aa linear

VRT 10-FEB-2016

DEFINITION selenoprotein N precursor [Gallus gallus].

ACCESSION NP\_001108444 XP\_417734

VERSION NP\_001108444.1

DBSOURCE REFSEQ: accession NM\_001114972.1

KEYWORDS RefSeq.

SOURCE Gallus gallus (chicken)

ORGANISM Gallus gallus

Eukaryota; Metazoa; Chordata;  
Craniata; Vertebrata; Euteleostomi;  
Archelosauria; Archosauria; Dinosauria;  
Saurischia; Theropoda; Coelurosauria;  
Aves; Neognathae; Galloanserae;  
Galliformes; Phasianidae; Phasianinae;  
Gallus.

>NP\_001108444.1 selenoprotein N precursor [Gallus gallus]  
MAVPGAAPSRLALALAALAALAAVKYYRDAEAARQQELALKSLGSEGLF  
LFSSLDTNNDLYLSPEEFKPIAEKLTGVTPVSDFEEDAPDPNGETLSIVA  
KFQPLVMETMTKSKDGFLGISHVALSGLRNWTAPVSPKSVMLARQFKA  
FLPPKNKLDLGDPWWIIPSELNIFTGYLSNNRFYPPPPKGKEIIHRLLSM  
FHPRPFVKTRFAPQGGSVACIQAISTYYYYTIAFRIHAEFQLNEPPDFPFWF  
SPGQFTGYIVLSKDSSHVREFKLFVPNKRSLNVDMEWLYGASEGSNME  
VDIGYLPQMELESTGPSVPSVIYDENGVIDSRDPSGEPIQFVFEEITW  
QQEIPWEEAAQKLEVAMYPFKKVSYPFTEAFERAKAEKKLVHSILLWG  
ALDDQSCUGSGRTLRETVLESSPILALLNESFISSWSLVKELEELQTNRE  
NEFYSKLADLHLEKYNFPVEMIICLPNGTVIHHINANYFLDITSMKPEDVE  
SSIFSFSANFDDPSTATYLQFLKEGLQRAKAYLQN

# Analysis of the SeIN

## The structural modeling of chicken SeIN

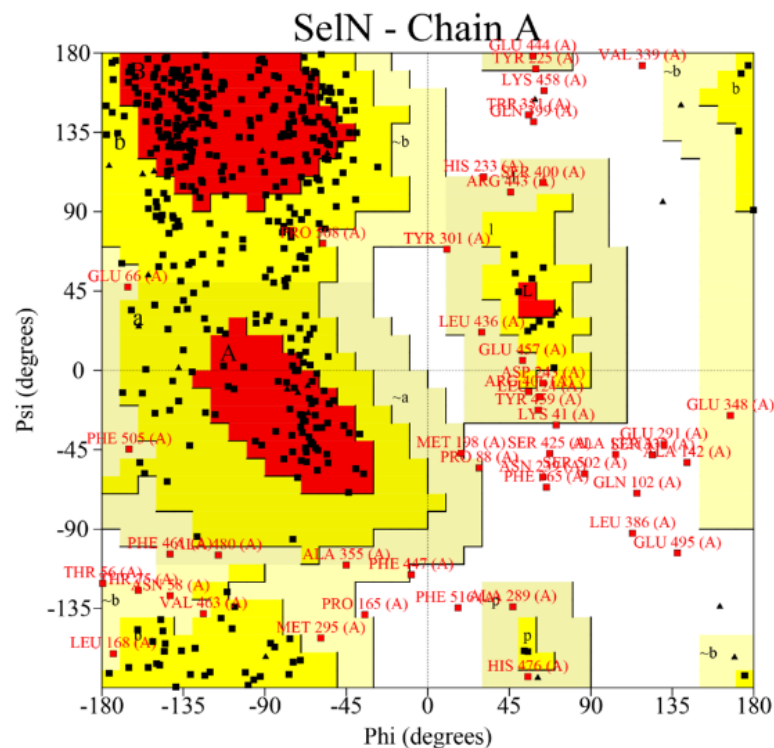

## Verify 3D

76.63% of the residues had an averaged 3D-1D score  $\geq 0.2$

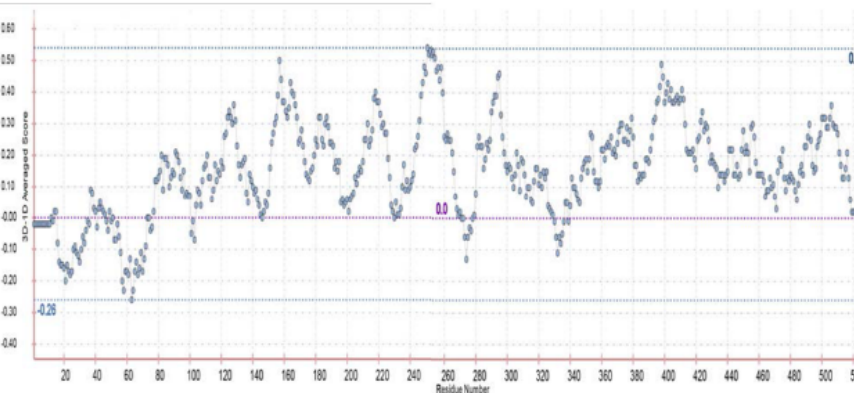

## ERRAT2

Overall quality factor\*\*: 73.684

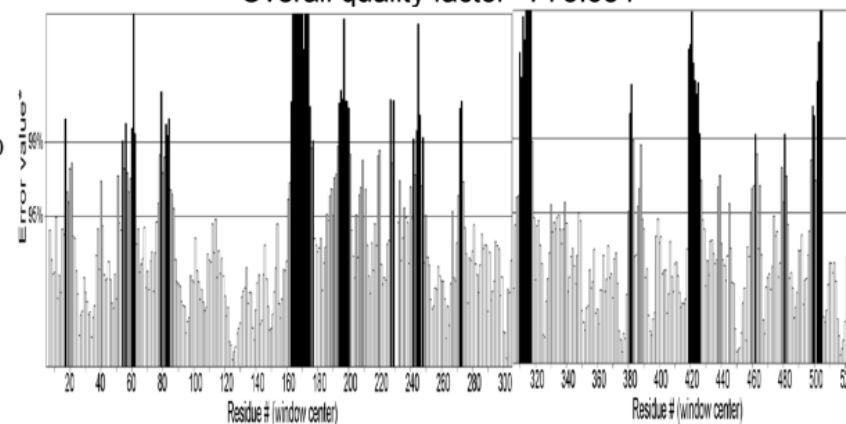

### The predictions of ligand binding sites in chicken SeIN

| Protein | Lig Name | C-score <sup>EC</sup> | Ligand Binding Site Residues                |
|---------|----------|-----------------------|---------------------------------------------|
| SeIN    | FE       | 0.07                  | 451, 455                                    |
|         | ADP      | 0.05                  | 207, 256, 257, 270, 284, 285                |
|         | ADP      | 0.05                  | 177, 206, 255, 256, 257, 258, 271, 284, 285 |
|         | CA       | 0.02                  | 250, 388                                    |
|         | N/A      | 0.02                  | 308, 313, 329, 358, 373, 380, 394           |

1. C-score is the confidence score of the prediction. C-score ranges (0-1), where a higher score indicates a more reliable prediction
2. Lig Name is name of possible binding ligand. The information of binding ligands is shown in PDB



## The accession number and amino acid sequences of chicken

### SelH

# SelH [Gallus gallus]

LOCUS NP\_001264794 129 aa linear

VRT 03-MAY-2016

DEFINITION selenoprotein H [Gallus gallus].

ACCESSION NP\_001264794 XP\_003641378

VERSION NP\_001264794.1

DBSOURCE REFSEQ: accession NM\_001277865.1

KEYWORDS RefSeq.

SOURCE Gallus gallus (chicken)

ORGANISM Gallus gallus

Eukaryota; Metazoa; Chordata;  
Craniata; Vertebrata; Euteleostomi;  
Archelosauria; Archosauria; Dinosauria;  
Saurischia; Theropoda; Coelurosauria;  
Aves; Neognathae; Galloanserae;  
Galliformes; Phasianidae; Phasianinae;  
Gallus.

>NP\_001264794.1 selenoprotein H [Gallus gallus]

MAPRGRKRAARRPAEPEARADPPEKRPRDEAEGSPGD  
AGGPRVVIEHCRSURVYGRNAAALSEALRGAVAALAVEI  
NPRQPRRNSFEVSLVKEDGSTVQLWSGIGKGPPRKLKF  
PEPAAVVEALRSSLA

# Analysis of the SelH

## The structural modeling of chicken SelH

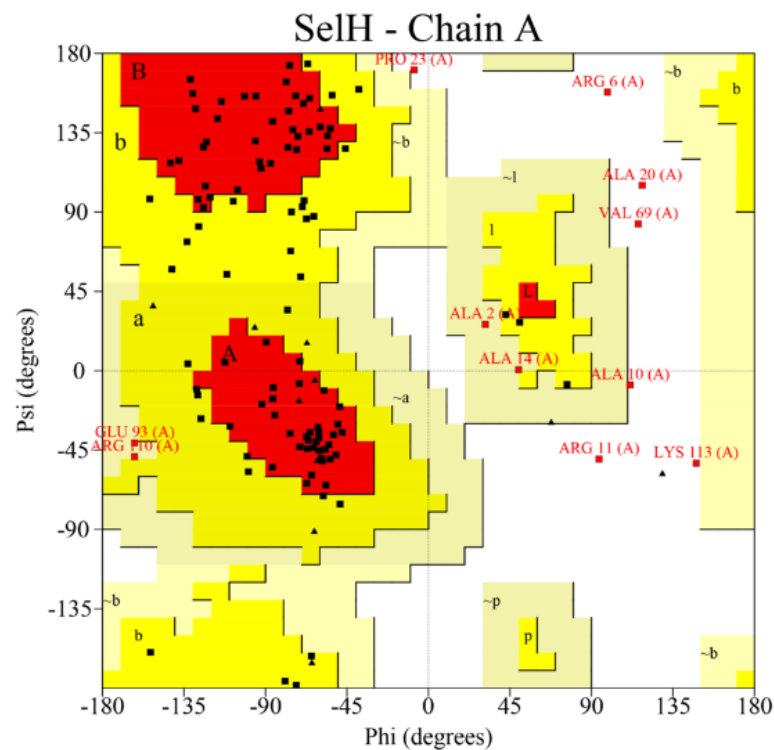

## Verify 3D

85.27% of the residues had an averaged 3D-1D score  $\geq 0.2$

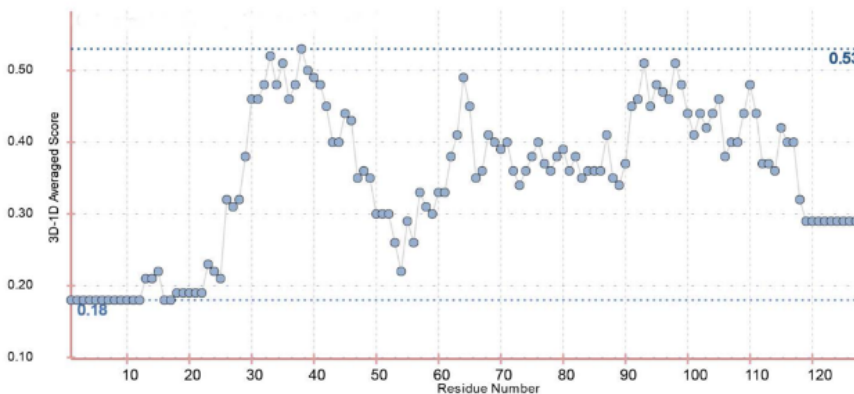

## ERRAT2

Overall quality factor\*\*: 92.373

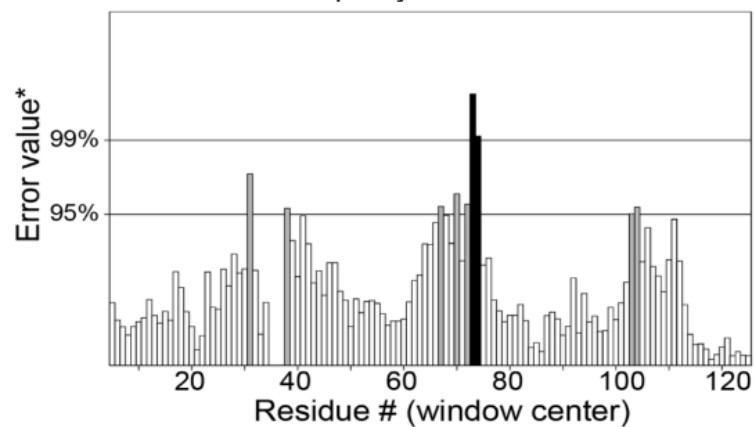

### The predictions of ligand binding sites in chicken SelH

| Protein | Lig Name | C-score <sup>EC</sup> | Ligand Binding Site Residues                                                                           |
|---------|----------|-----------------------|--------------------------------------------------------------------------------------------------------|
| SelH    | CLA      | 0.07                  | 61, 72                                                                                                 |
|         | 1R64A00  | 0.06                  | 47, 51, 52, 53, 54 ,55, 57, 81, 82, 83, 84,<br>85, 103, 104, 106, 107, 108, 110, 111, 112,<br>113, 114 |
|         | PHO      | 0.06                  | 60, 61, 64, 65                                                                                         |
|         | MG       | 0.03                  | 82, 85                                                                                                 |
|         | PO4      | 0.03                  | 50, 51, 52, 53, 86                                                                                     |

1. C-score is the confidence score of the prediction. C-score ranges (0-1), where a higher score indicates a more reliable prediction
2. Lig Name is name of possible binding ligand. The information of binding ligands is shown in PDB

## The accession number and amino acid sequences of chicken

### SelW

# SelW [Gallus gallus]

LOCUS ACX47065 85 aa linear VRT  
17-AUG-2011

DEFINITION selenoprotein W [Gallus gallus].

ACCESSION ACX47065

VERSION ACX47065.1

DBSOURCE accession GQ919055.1

KEYWORDS .

SOURCE Gallus gallus (chicken)

ORGANISM Gallus gallus

Eukaryota; Metazoa; Chordata;  
Craniata; Vertebrata; Euteleostomi;  
Archelosauria; Archosauria; Dinosauria;  
Saurischia; Theropoda; Coelurosauria;  
Aves; Neognathae; Galloanserae;  
Galliformes; Phasianidae; Phasianinae;  
Gallus.

>ACX47065.1 selenoprotein W [Gallus gallus]

MPLRVTVLYCGAUGYKPKYERLRAELEKRFPGALEMRG  
QGTQEVTGWFEVTVGSRLVHSSKKNMGDFVDTDAKLQRI  
VAAIQAAALP

# Analysis of the SelW

## The structural modeling of chicken SelW

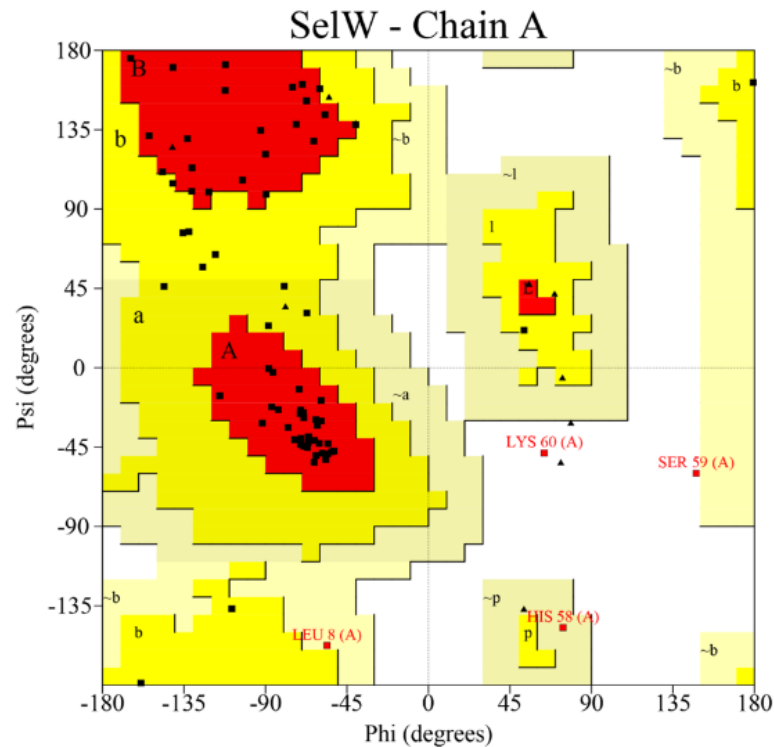

## Verify 3D

100.00% of the residues had an averaged 3D-1D score  $\geq 0.2$

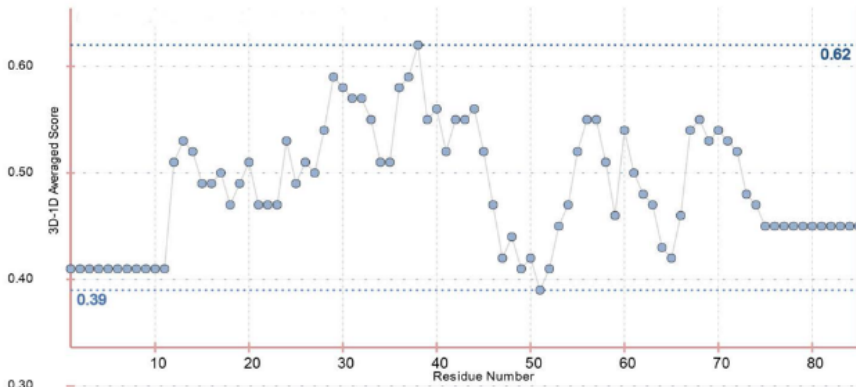

## ERRAT2

Overall quality factor\*\*: 85.714

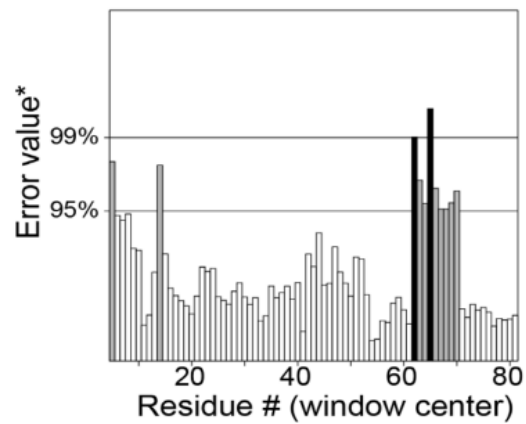

### The predictions of ligand binding sites in chicken SelW

| Protein | Lig Name | C-score <sup>EC</sup> | Ligand Binding Site Residues               |
|---------|----------|-----------------------|--------------------------------------------|
| SelW    | ZN       | 0.12                  | 10, 13                                     |
|         | MG       | 0.06                  | 25, 28                                     |
|         | 2REMC00  | 0.05                  | 13, 18, 44, 45, 46, 47, 60, 61, 65, 66, 68 |
|         | MG       | 0.04                  | 29, 30, 77                                 |
|         | SO4      | 0.04                  | 72, 75, 76                                 |

1. C-score is the confidence score of the prediction. C-score ranges (0-1), where a higher score indicates a more reliable prediction
2. Lig Name is name of possible binding ligand. The information of binding ligands is shown in PDB

## The accession number and amino acid sequences of chicken

Sep15

### Sep15 [Gallus gallus]

LOCUS NP\_001012944 160 aa linear  
VRT 24-APR-2016  
DEFINITION 15 kDa selenoprotein precursor [Gallus gallus].  
ACCESSION NP\_001012944 XP\_422358  
VERSION NP\_001012944.2  
DBSOURCE REFSEQ: accession NM\_001012926.2  
KEYWORDS RefSeq.  
SOURCE Gallus gallus (chicken)  
ORGANISM Gallus gallus  
Eukaryota; Metazoa; Chordata;  
Craniata; Vertebrata; Euteleostomi;  
Archelosauria; Archosauria; Dinosauria;  
Saurischia; Theropoda; Coelurosauria;  
Aves; Neognathae; Galloanserae;  
Galliformes; Phasianidae; Phasianinae;  
Gallus.

>NP\_001012944.2 15 kDa selenoprotein precursor  
[Gallus gallus]

MAAAAELAALVRCWLCLLLGLPAINVYGAQLSSEACREL  
GFSSNLLCSSCNLLGQFSLNQLDPFCRQCCQEEAQLT  
RKLYAGAVLEVCGUKLGRFPQVQAFVRSDKPKLFRGLQI  
KYVRGSDPVLKLLDDSGNIAEELSILKWNTDSVEEFLSE  
KLERL

# Analysis of the Sep15

## The structural modeling of chicken Sep15

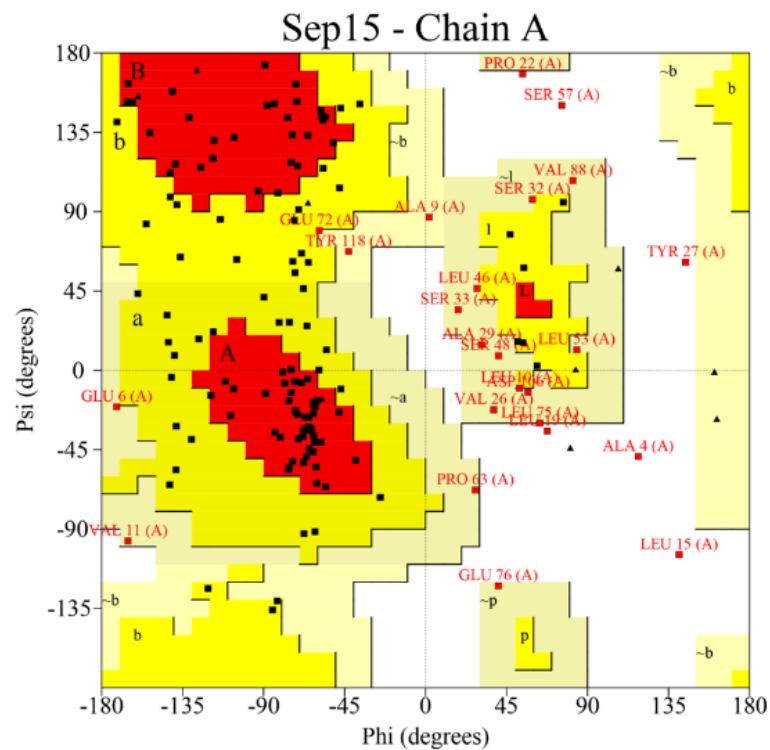

Plot statistics

|                                                      |     |        |
|------------------------------------------------------|-----|--------|
| Residues in most favoured regions [A,B,L]            | 74  | 51.7%  |
| Residues in additional allowed regions [a,b,l,p]     | 47  | 32.9%  |
| Residues in generously allowed regions [~a,~b,~l,~p] | 17  | 11.9%  |
| Residues in disallowed regions                       | 5   | 3.5%   |
| Number of non-glycine and non-proline residues       | 143 | 100.0% |
| Number of end-residues (excl. Gly and Pro)           | 2   |        |
| Number of glycine residues (shown as triangles)      | 10  |        |
| Number of proline residues                           | 5   |        |
| Total number of residues                             | 160 |        |

## Verify 3D

85.00% of the residues had an averaged 3D-1D score  $\geq 0.2$

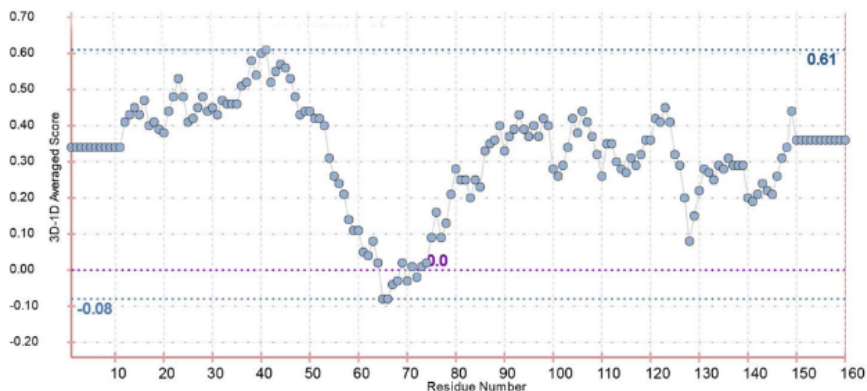

## ERRAT2

Overall quality factor\*\*: 73.026

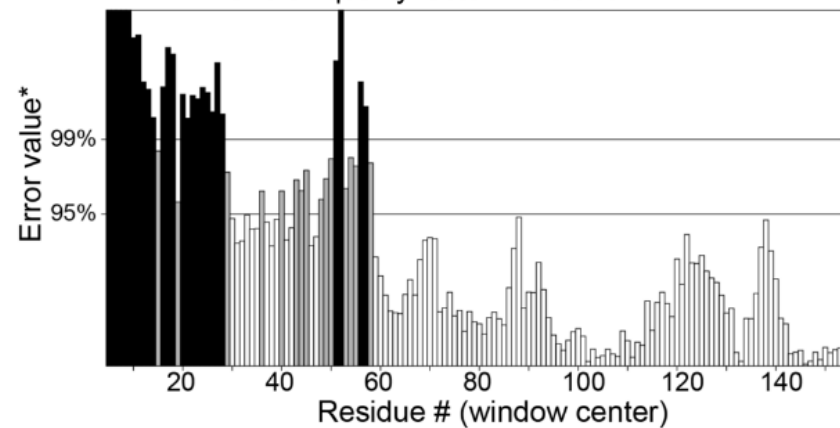



### The predictions of ligand binding sites in chicken Sep15

| Protein | Lig Name | C-score <sup>EC</sup> | Ligand Binding Site Residues |
|---------|----------|-----------------------|------------------------------|
| Sep15   | ZN       | 0.15                  | 47, 50, 65, 68               |
|         | NAP      | 0.04                  | 102, 103                     |
|         | IMD      | 0.04                  | 126, 128, 139                |
|         | BEF      | 0.04                  | 87, 88, 89, 124, 142         |
|         | CA       | 0.03                  | 147, 150                     |

1. C-score is the confidence score of the prediction. C-score ranges (0-1), where a higher score indicates a more reliable prediction
2. Lig Name is name of possible binding ligand. The information of binding ligands is shown in PDB

## The accession number and amino acid sequences of chicken

### SeIM

# SeIM [Gallus gallus]

LOCUS NP\_001264788 152 aa linear

VRT 24-APR-2016

DEFINITION selenoprotein M precursor [Gallus gallus].

ACCESSION NP\_001264788

VERSION NP\_001264788.1

DBSOURCE REFSEQ: accession NM\_001277859.1

KEYWORDS RefSeq.

SOURCE Gallus gallus (chicken)

ORGANISM Gallus gallus

Eukaryota; Metazoa; Chordata;  
Craniata; Vertebrata; Euteleostomi;  
Archelosauria; Archosauria; Dinosauria;  
Saurischia; Theropoda; Coelurosauria;  
Aves; Neognathae; Galloanserae;  
Galliformes; Phasianidae; Phasianinae;  
Gallus.

>NP\_001264788.1 selenoprotein M precursor [Gallus gallus]

MRRAALAALLLLAAAAGIERRPPRGLARGKVETCGGUR  
LSRLPEVKAFVSQDIPLYHNLEMKHLPGADPELVLLSFR  
YEELERIPLSDMTREEINQLVQELGFYRKETPEAPVPEE  
FQFAPAKPLPTLTPTRRAPAADGKTLSEQDKKDHPDL

# Analysis of the SelM

## The structural modeling of chicken SelM

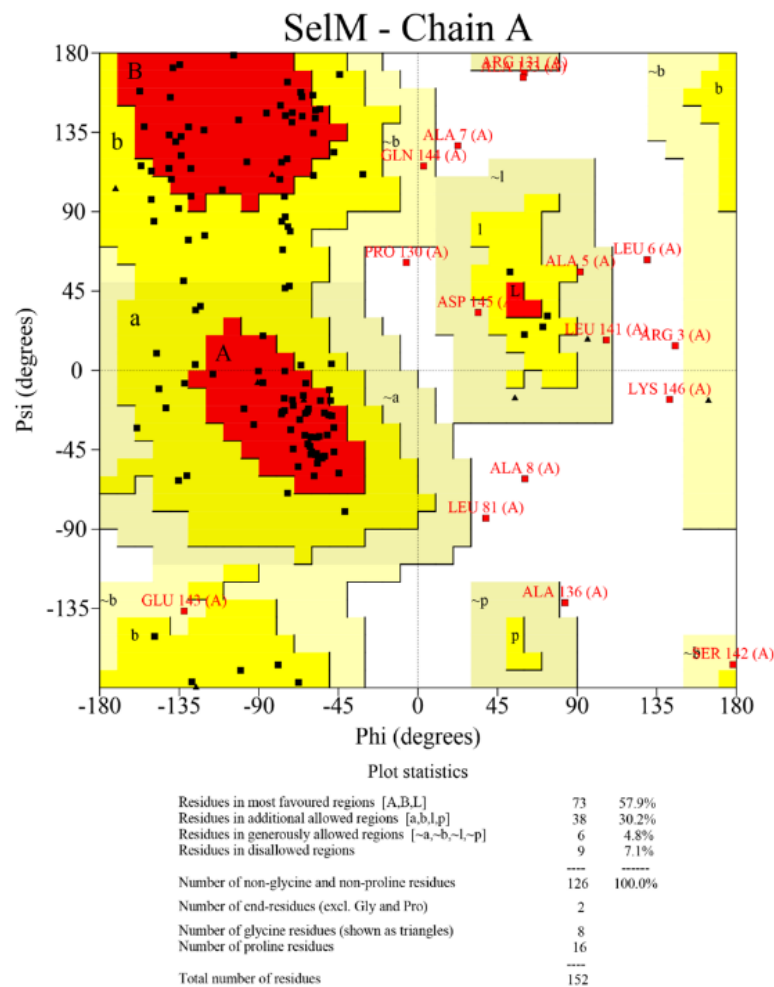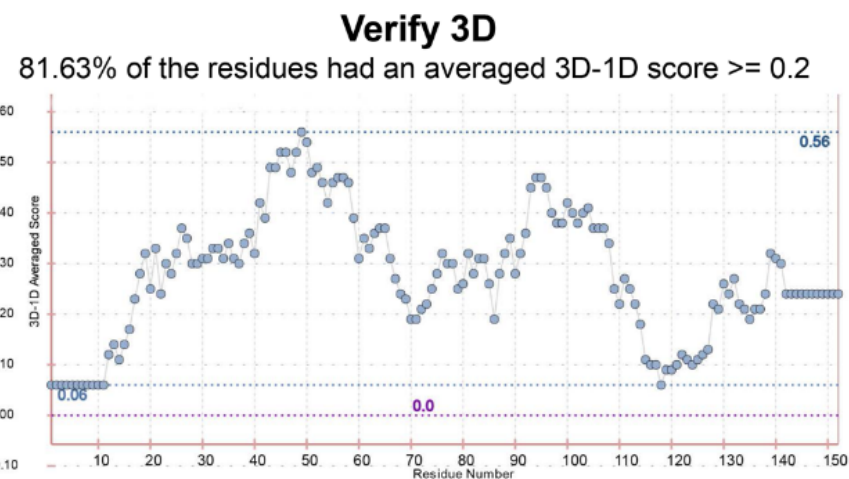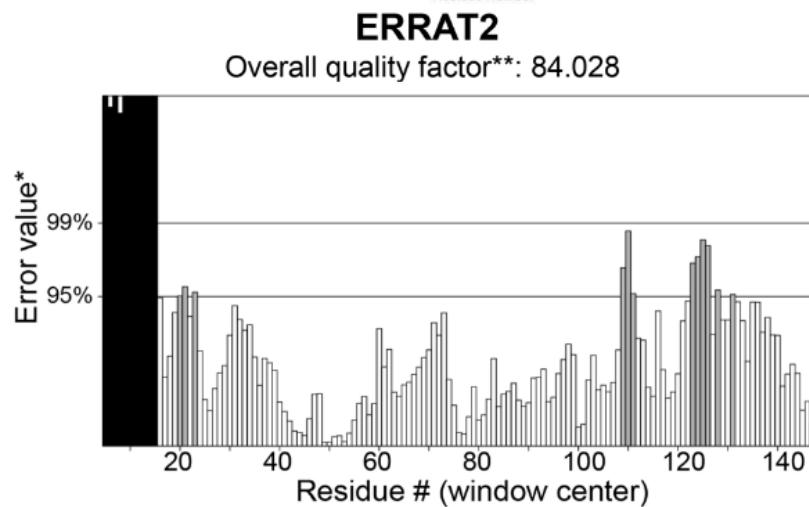

### The predictions of ligand binding sites in chicken SelM

| Protein | Lig Name | C-score <sup>EC</sup> | Ligand Binding Site Residues |
|---------|----------|-----------------------|------------------------------|
| SelM    | ZN       | 0.11                  | 34, 37                       |
|         | UNK      | 0.06                  | 98, 101                      |
|         | MG       | 0.04                  | 55, 56, 95                   |
|         | S45      | 0.04                  | 59, 86, 94, 97, 98, 101      |
|         | SE       | 0.04                  | 84, 89                       |

1. C-score is the confidence score of the prediction. C-score ranges (0-1), where a higher score indicates a more reliable prediction
2. Lig Name is name of possible binding ligand. The information of binding ligands is shown in PDB

## The accession number and amino acid sequences of chicken

### SepP1

# SepP1 [Gallus gallus]

LOCUS NP\_001026780 393 aa linear

VRT 24-APR-2016

DEFINITION selenoprotein P precursor [Gallus gallus].

ACCESSION NP\_001026780 XP\_429142

VERSION NP\_001026780.2

DBSOURCE REFSEQ: accession NM\_001031609.2

KEYWORDS RefSeq.

SOURCE Gallus gallus (chicken)

ORGANISM Gallus gallus

Eukaryota; Metazoa; Chordata;  
Craniata; Vertebrata; Euteleostomi;  
Archelosauria; Archosauria; Dinosauria;  
Saurischia; Theropoda; Coelurosauria;  
Aves; Neognathae; Galloanserae;  
Galliformes; Phasianidae; Phasianinae;  
Gallus.

>NP\_001026780.2 selenoprotein P precursor [Gallus gallus]

MWAGLGLALVLCLLPGGGTESQRCQEPPEWHIGEESPMLNARGSVAV  
VALLQASUYLCLLQASRLEDLRVKLENEGLVNI SYVVVNHQSPHSQKKF  
HLLQESVSDHITVYQQDDHQADVWTTLNGNKDDFLIYDRCGRLVYHLG  
LPYSFLSFQYVEEAIKIAYCENNCGNCSYTEPDIDNICENITKKEDENLAG  
IEPEPEPSGQHSHHHHQLHRHRHHHHHREGGRHSKTQNHQAPSESQ  
RRHPHNGRRHRVFNHNRHDQIGSHEQVETLPPGEGVENLPRVTKLUK  
KGKTICKNQLTUNWQTASDSTTSSUCCHCRHLLFEELGNSITUQCRGA  
LPNSCRUHGQLLAEDITESUQURLLTAAUESAAGGGSETSDTUQUQUER  
AGNUAUKTN

# Analysis of the SepP1

## The structural modeling of chicken SepP1

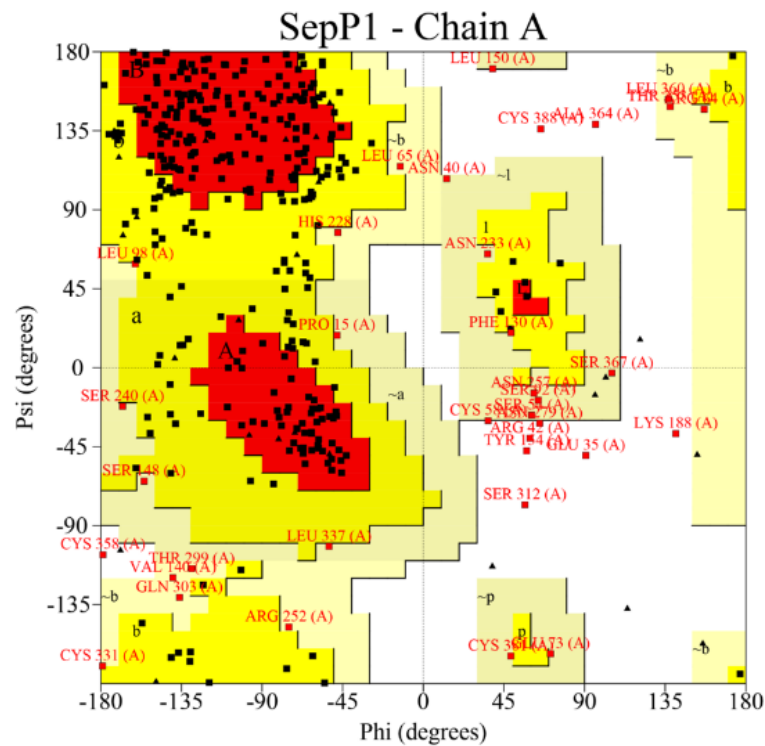

## Verify 3D

85.37% of the residues had an averaged 3D-1D score  $\geq 0.2$

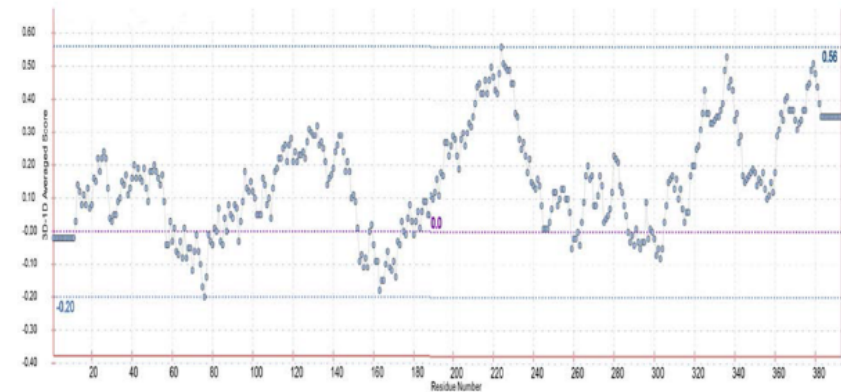

## ERRAT2

Overall quality factor\*\*: 71.545

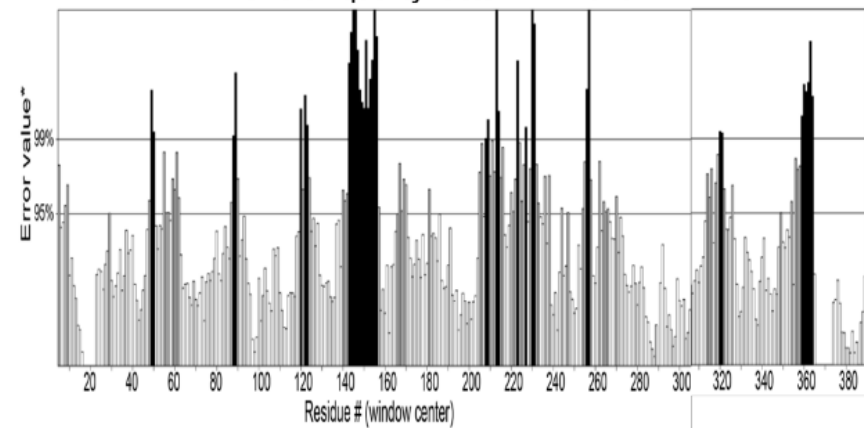

### The predictions of ligand binding sites in chicken SepP1

| Protein | Lig Name | C-score <sup>EC</sup> | Ligand Binding Site Residues |
|---------|----------|-----------------------|------------------------------|
| SepP1   | MG       | 0.06                  | 32, 47, 48, 67, 135          |
|         | GLC      | 0.03                  | 66, 129                      |
|         | CA       | 0.03                  | 67, 69, 79, 81, 122          |
|         | CA       | 0.03                  | 40, 41, 139, 140             |
|         | ZN       | 0.03                  | 134, 142                     |

1. C-score is the confidence score of the prediction. C-score ranges (0-1), where a higher score indicates a more reliable prediction

2. Lig Name is name of possible binding ligand. The information of binding ligands is shown in PDB

## The accession number and amino acid sequences of chicken

### SepP2

# SepP2 [*Gallus gallus*]

LOCUS XP\_003641735 263 aa linear

VRT 04-JAN-2016

DEFINITION PREDICTED: selenoprotein Pb [*Gallus gallus*].

ACCESSION XP\_003641735

VERSION XP\_003641735.3

DBLINK BioProject: PRJNA10808

DBSOURCE REFSEQ: accession XM\_003641687.3

KEYWORDS RefSeq.

SOURCE *Gallus gallus* (chicken)

ORGANISM *Gallus gallus*

Eukaryota; Metazoa; Chordata;  
Craniata; Vertebrata; Euteleostomi;  
Archelosauria; Archosauria; Dinosauria;  
Saurischia; Theropoda; Coelurosauria;  
Aves; Neognathae; Galloanserae;  
Galliformes; Phasianidae; Phasianinae;  
*Gallus*.

>XP\_003641735.3 PREDICTED: selenoprotein Pb [*Gallus gallus*]

MGPLLLALASCLGLAVASEGATNGSRLCHEAPAWRINGS  
SPMEGAAGQVTVVALLKASUHFCLLQARSLGALRERLG  
QQGVSDVRYVIVNEQAPLSRAMFGELQRHAPPGVVPV  
QQQPHEPDVWQLLGGDKDDFLVYDRCGRLAFHIQLPY  
SFLHLPYVESAIRFTHRKDFCGNCSLYPNSTQEANSTME  
VPATLTPLPKQEEKESETPAHHQPNHLHPHHRAVGNGT  
APEPSGDHRPAHAHHHHGAHGKLHPKGQTPEGRDP



# Analysis of the SepP2

## The structural modeling of chicken SepP2

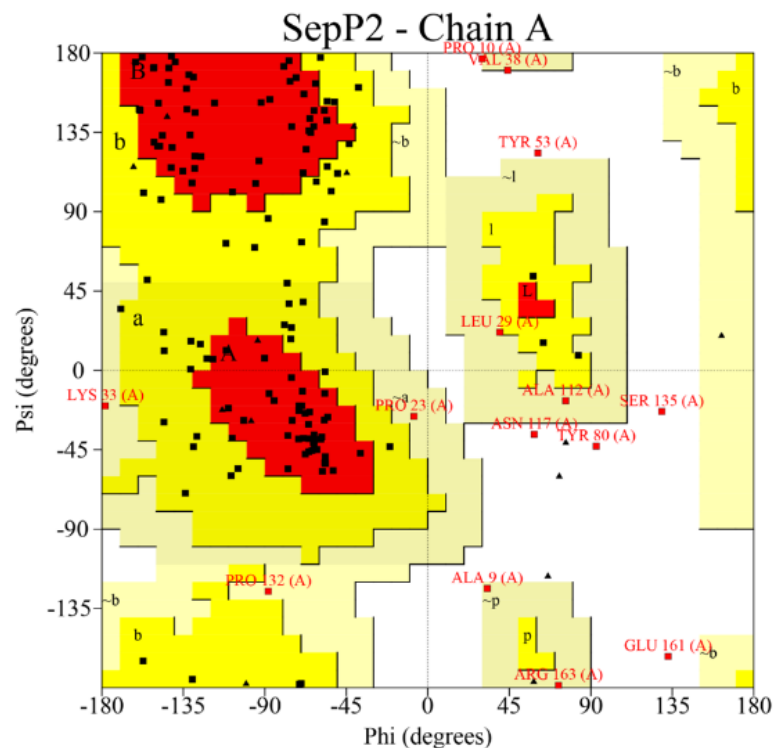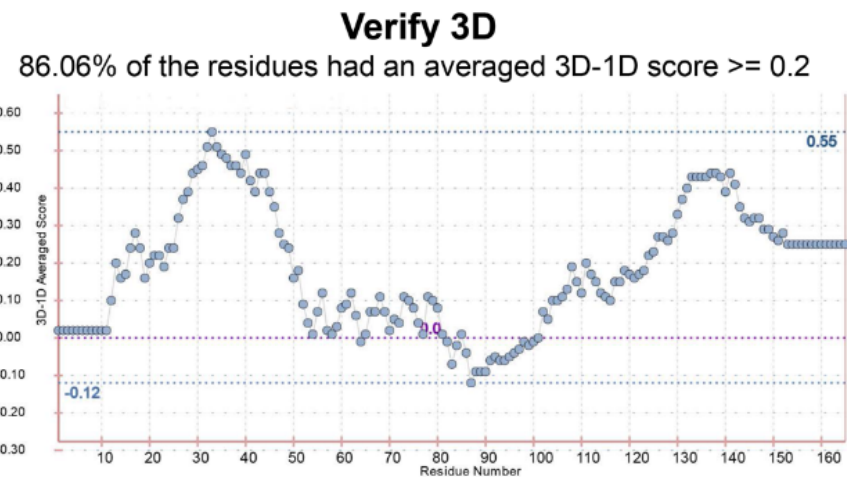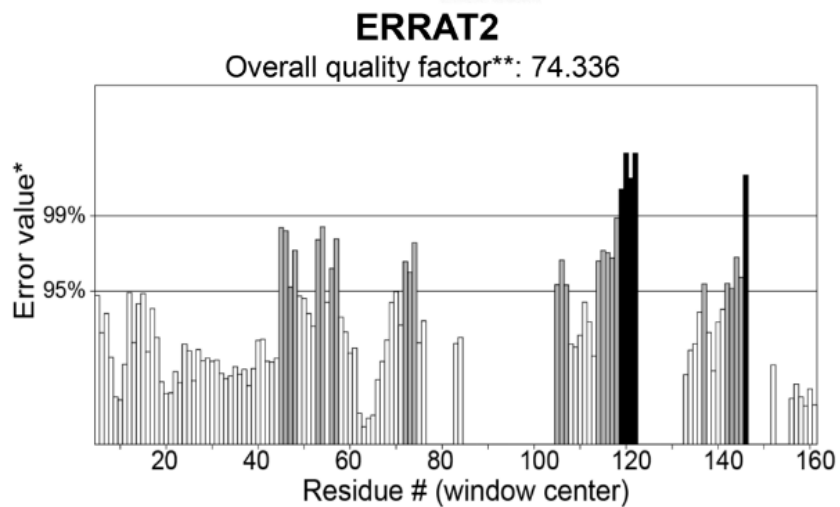

### The predictions of ligand binding sites in chicken SepP2

| Protein | Lig Name | C-score <sup>EC</sup> | Ligand Binding Site Residues |
|---------|----------|-----------------------|------------------------------|
| SepP2   | MG       | 0.07                  | 32, 47, 48, 67, 135          |
|         | GLC      | 0.05                  | 66, 129                      |
|         | CA       | 0.03                  | 67, 69, 79, 81, 122          |
|         | CA       | 0.02                  | 40, 41, 139, 140             |
|         | ZN       | 0.02                  | 134, 142                     |

1. C-score is the confidence score of the prediction. C-score ranges (0-1), where a higher score indicates a more reliable prediction
2. Lig Name is name of possible binding ligand. The information of binding ligands is shown in PDB

## The accession number and amino acid sequences of chicken

### SelO

# SelO [Gallus gallus]

LOCUS NP\_001108489 650 aa linear  
VRT 29-SEP-2016

DEFINITION selenoprotein O [Gallus gallus].  
ACCESSION NP\_001108489 XP\_415989  
VERSION NP\_001108489.2  
DBSOURCE REFSEQ: accession NM\_001115017.2  
KEYWORDS RefSeq.  
SOURCE Gallus gallus (chicken)  
ORGANISM Gallus gallus  
Eukaryota; Metazoa; Chordata;  
Craniata; Vertebrata; Euteleostomi;  
Archelosauria; Archosauria; Dinosauria;  
Saurischia; Theropoda; Coelurosauria;  
Aves; Neognathae; Galloanserae;  
Galliformes; Phasianidae; Phasianinae;  
Gallus.

>NP\_001108489.2 selenoprotein O [Gallus gallus]  
MQRSAGPPSRPGSPERADGGGWLSALRFDNLALRSLPVDPSSEDCAP  
RAVPGACFARVRPTPLRNPRLVAMSAPALALLGLEAGGPEAEREAEAL  
YFSGNRLLPGSEPAAHCYCGHQFGSFAGQLGDGAAIYLGEVRGPRGA  
RWELQLKGAGITPFSRQADGRKVLRSSIREFLCSEAMFHLGIPTTRAGT  
CVTSDSEVVRDIFYDGNPKKERCTVVLRIASTFIRFGSFEIFKPPDEYTG  
RKGPSVNRNDIRIQMLDYVIGTFYPEIQEAHADNSIQRNAAFFKEITKRT  
ARLVAEWQCVGFCHGVLNTDNMSIVGLTIDYGPFMFMDRYDPEHICNG  
SDNTGRYAYNKQPEICKWNLGKLAELVPELPLEISELILEEEYDAEFEK  
HYLQKMRKKLGLIQLELEEDSKLVSELLETMHILTGGDFTNIFYLLSSFSV  
DTPSPRLEDLFLEKLISQCASVEELRVAFKPQMDPRQLSMMLMLAQSNP  
QLFALIGTKANINKELERIEQFSKLQQLTAADLLSRNKRHWTEWLEKYRV  
RLHKEVESISDVDAWNTERVKVMNSNNPKYILRNYIAQNAIEAAENGDF  
SEVRNVLKLLNPFQETEDSTEMETKEEEATATAACAQATRSRLSYCS  
KPPLWASELCVTUSS

# Analysis of the SeIO

## The structural modeling of chicken SeIO

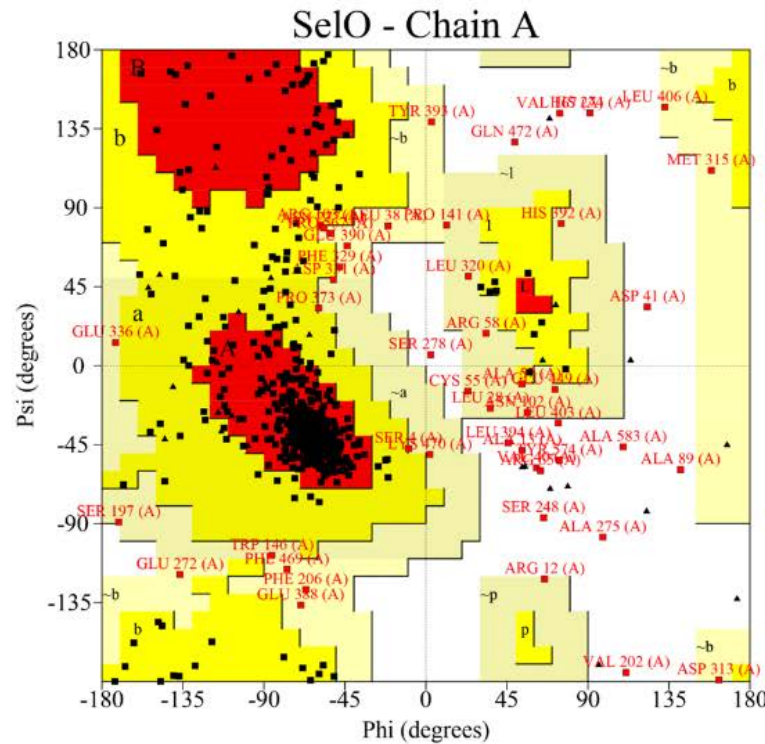

## Verify 3D

85.89% of the residues had an averaged 3D-1D score  $\geq 0.2$

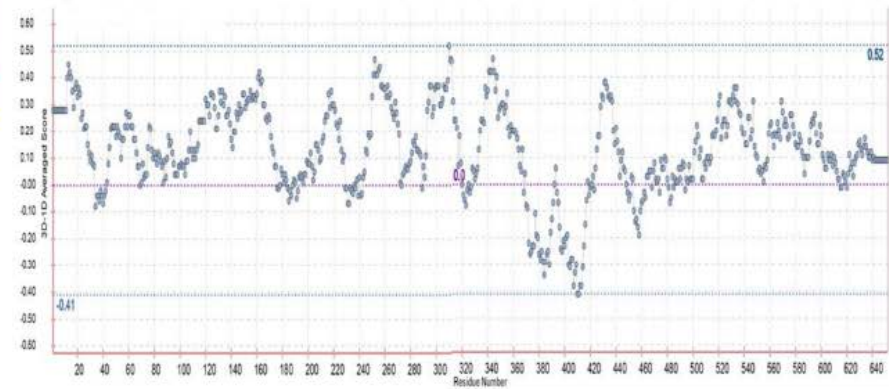

## ERRAT2

Overall quality factor\*\*: 90.528

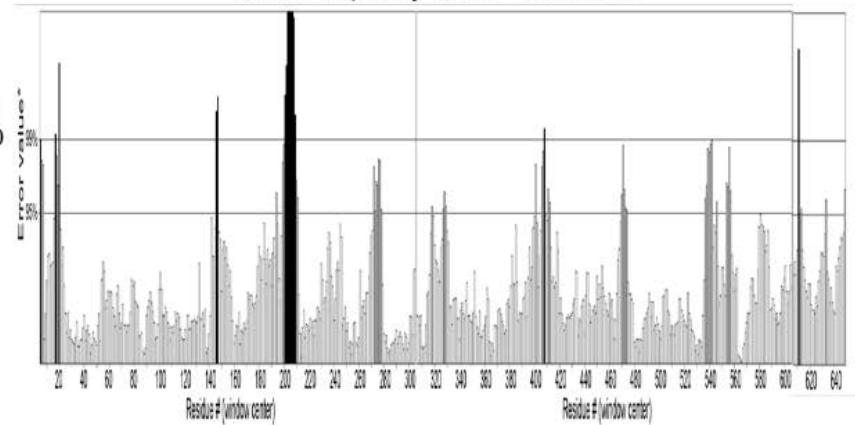

### The predictions of ligand binding sites in chicken SelO

| Protein | Lig Name | C-score <sup>EC</sup> | Ligand Binding Site Residues           |
|---------|----------|-----------------------|----------------------------------------|
| SelO    | MG       | 0.12                  | 314, 323                               |
|         | FES      | 0.05                  | 320, 321, 322, 324, 326, 327, 329, 331 |
|         | Nuc.Acid | 0.04                  | 288, 291                               |
|         | FES      | 0.04                  | 152, 153, 154, 202, 203                |
|         | Nuc.Acid | 0.04                  | 314, 315, 316, 317, 318, 319, 321      |

1. C-score is the confidence score of the prediction. C-score ranges (0-1), where a higher score indicates a more reliable prediction
2. Lig Name is name of possible binding ligand. The information of binding ligands is shown in PDB

## The accession number and amino acid sequences of chicken

### SelU

# SelU [Gallus gallus]

LOCUS NP\_001180447 224 aa linear  
VRT 28-AUG-2016

DEFINITION redox-regulatory protein FAM213A  
[Gallus gallus].

ACCESSION NP\_001180447

VERSION NP\_001180447.1

DBSOURCE REFSEQ: accession NM\_001193518.1

KEYWORDS RefSeq.

SOURCE Gallus gallus (chicken)

ORGANISM Gallus gallus

Eukaryota; Metazoa; Chordata;  
Craniata; Vertebrata; Euteleostomi;  
Archelosauria; Archosauria; Dinosauria;  
Saurischia; Theropoda; Coelurosauria;  
Aves; Neognathae; Galloanserae;  
Galliformes; Phasianidae; Phasianinae;  
Gallus.

>NP\_001180447.1 redox-regulatory protein FAM213A  
[Gallus gallus]

MSFLPDFGIFTMGMWSVGLGAVGAAITGIVLANTDLFLS  
KPEKATLEFLEAIELKTLGSEPRTFKASELWKKNGAVIMA  
VRRPGUFLCREEASELSSLKPQLSKLGVPLYAVVKEKIG  
TEVEDFQHYFQGEIFLDEKRSFYGPRKRKMMLSGFFRI  
GVWQNFFRAWKNGYSGNLEGEFTLGGVYVIGAGRQ  
GVLLEHREKEFGDKVSLPSVLEAAEKIKPQAS

# Analysis of the SelU

## The structural modeling of chicken SelU

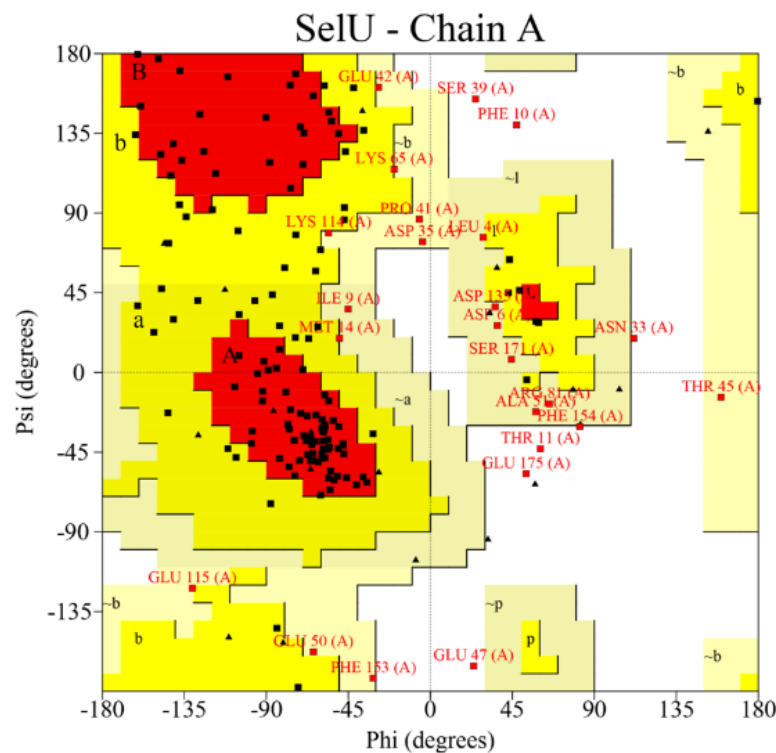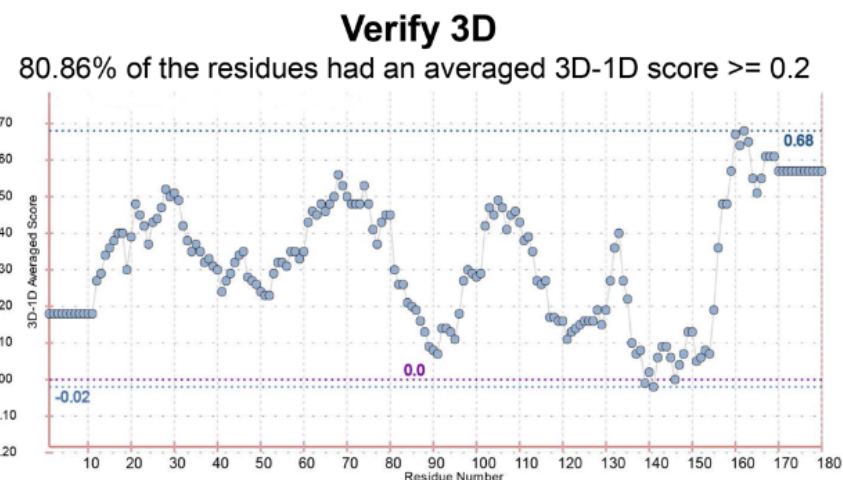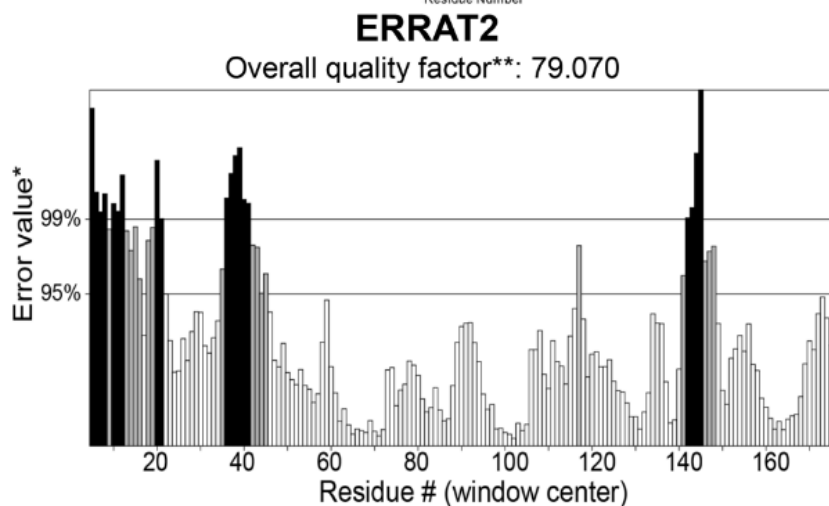

### The predictions of ligand binding sites in chicken SelU

| Protein | Lig Name | C-score <sup>EC</sup> | Ligand Binding Site Residues        |
|---------|----------|-----------------------|-------------------------------------|
| SelU    | ACT      | 0.37                  | 81, 85, 86, 87, 88                  |
|         | 2V2GC02  | 0.04                  | 15, 19, 23, 35, 36, 37, 38, 39, 144 |
|         | MG       | 0.03                  | 79, 80, 112, 113, 114, 141, 151     |
|         | CA       | 0.03                  | 57, 58, 59, 64, 131, 132            |
|         | HOS      | 0.02                  | 88, 91, 110, 112                    |

1. C-score is the confidence score of the prediction. C-score ranges (0-1), where a higher score indicates a more reliable prediction
2. Lig Name is name of possible binding ligand. The information of binding ligands is shown in PDB



## The accession number and amino acid sequences of chicken

### MsrB1

# MsrB1 [Gallus gallus]

LOCUS NP\_001129030 111 aa linear  
VRT 24-APR-2016  
DEFINITION methionine-R-sulfoxide reductase B1  
[Gallus gallus].  
ACCESSION NP\_001129030 XP\_414841  
VERSION NP\_001129030.1  
DBSOURCE REFSEQ: accession NM\_001135558.2  
KEYWORDS RefSeq.  
SOURCE Gallus gallus (chicken)  
ORGANISM Gallus gallus  
Eukaryota; Metazoa; Chordata;  
Craniata; Vertebrata; Euteleostomi;  
Archelosauria; Archosauria; Dinosauria;  
Saurischia; Theropoda; Coelurosauria;  
Aves; Neognathae; Galloanserae;  
Galliformes; Phasianidae; Phasianinae;  
Gallus.  
>NP\_001129030.1 methionine-R-sulfoxide reductase B1  
[Gallus gallus]  
MSFCSFFGGGEVFKDHFEPGVYVCARCGYELFSSRAKY  
EHSSPWPAFTETIHEDSVAKRKERPGALKVSCGKCGNG  
LGHEFLNDGPKRGQSRFUIFSSSLKFIPKGKSPQEN

# Analysis of the MsrB1

## The structural modeling of chicken MsrB1

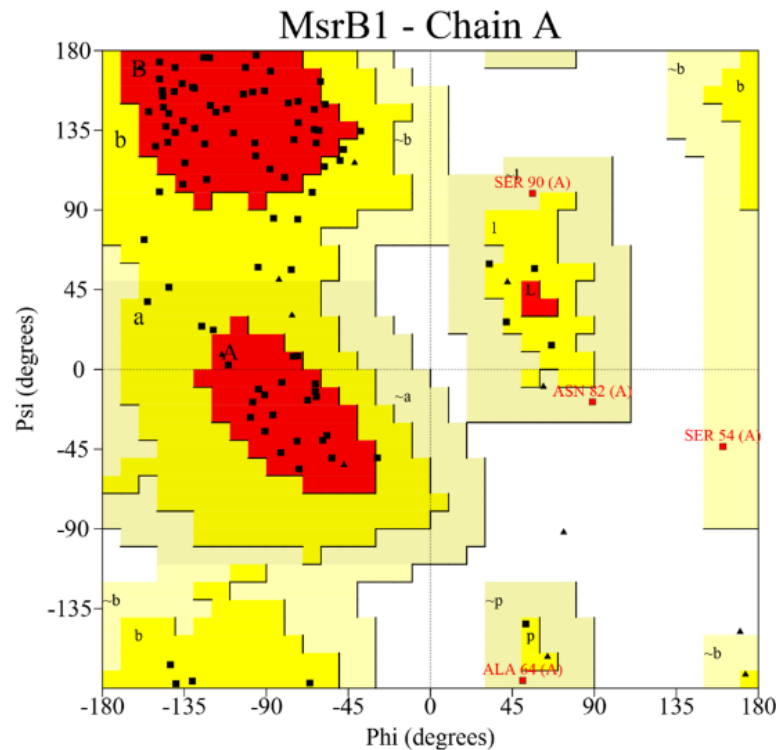

Plot statistics

|                                                      |     |        |
|------------------------------------------------------|-----|--------|
| Residues in most favoured regions [A,B,L]            | 64  | 71.1%  |
| Residues in additional allowed regions [a,b,l,p]     | 22  | 24.4%  |
| Residues in generously allowed regions [-a,-b,-l,-p] | 4   | 4.4%   |
| Residues in disallowed regions                       | 0   | 0.0%   |
| Number of non-glycine and non-proline residues       | 90  | 100.0% |
| Number of end-residues (excl. Gly and Pro)           | 2   |        |
| Number of glycine residues (shown as triangles)      | 12  |        |
| Number of proline residues                           | 7   |        |
| Total number of residues                             | 111 |        |

## Verify 3D

83.96% of the residues had an averaged 3D-1D score  $\geq 0.2$

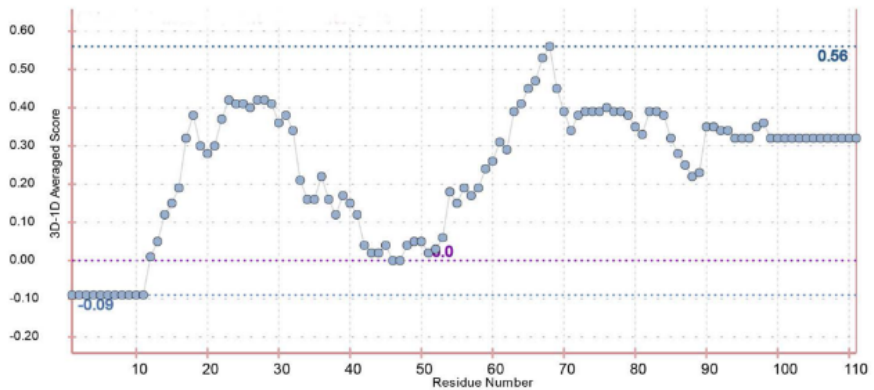

## ERRAT2

Overall quality factor\*\*: 91.919

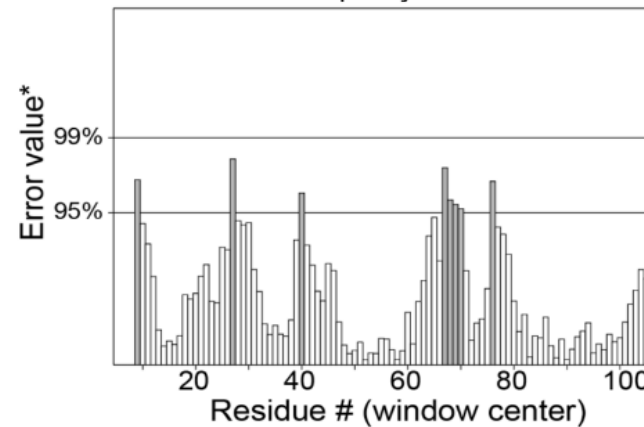

### The predictions of ligand binding sites in chicken MsrB1

| Protein | Lig Name | C-score <sup>EC</sup> | Ligand Binding Site Residues |
|---------|----------|-----------------------|------------------------------|
| MsrB1   | ZN       | 0.55                  | 23, 26, 69, 72               |
|         | RSM      | 0.11                  | 64, 77, 78, 80, 91, 93, 94   |
|         | PEPTIDE  | 0.02                  | 64, 78, 80, 91, 93           |
|         | 3HCHB02  | 0.01                  | 24, 27, 100                  |
|         | 3HCHA02  | 0.01                  | 36, 37, 38, 39               |

1. C-score is the confidence score of the prediction. C-score ranges (0-1), where a higher score indicates a more reliable prediction
2. Lig Name is name of possible binding ligand. The information of binding ligands is shown in PDB
